# Supplementary material for: Meniscus injury prediction model based on metric learning
Source: PeerJ Comput Sci. 2024 Jul 24;10:e2177. doi: 10.7717/peerj-cs.2177 (PMC11639670; doi:10.7717/peerj-cs.2177)
Supplement: Supplemental Information 1 — The data used for direct code use does not include explanatory information. [file peerj-cs-10-2177-s001.xls]

## Sheet: Sheet1
0	0	0	1	0	1	1	0	0	1	0	0	0	0	0
0	0	0	0	0	1	0	0	0	1	1	1	1	1	1
0	0	0	0	0	1	1	0	0	1	1	1	0	1	1
0	1	0	0	0	1	1	0	0	1	1	1	1	1	1
0	0	0	1	0	1	1	0	0	1	1	1	1	1	1
0	1	1	0	1	1	0	0	0	1	1	1	0	1	1
0	1	1	0	0	1	0	0	0	1	1	1	1	1	1
0	1	1	0	0	1	0	0	0	1	1	1	1	1	0
0	1	1	0	0	0	0	0	0	1	0	1	1	1	0
0	0	0	0	0	1	0	0	0	1	1	1	0	0	0
0	1	0	0	0	1	0	0	0	1	1	1	0	1	1
0	1	1	0	0	1	0	0	0	1	1	1	1	1	1
0	1	1	0	0	0	1	0	0	1	1	1	0	1	0
0	1	0	0	0	0	1	0	0	1	1	1	0	1	1
0	1	0	0	0	0	1	0	0	1	0	1	1	1	1
0	0	0	0	0	1	0	0	0	0	0	1	0	1	0
0	0	0	1	0	0	0	0	0	0	0	1	0	0	0
0	0	0	1	1	0	0	0	1	1	0	1	0	0	0
0	0	0	1	0	0	0	0	0	0	0	1	0	1	0
0	1	0	0	0	0	0	0	0	0	0	1	0	0	0
1	1	1	0	0	1	0	0	0	1	0	1	1	1	1
1	0	0	0	0	1	1	0	0	1	0	1	1	1	1
1	0	0	1	0	1	0	0	0	1	1	1	0	1	1
1	0	0	1	0	1	1	0	0	1	0	1	1	1	1
1	1	0	0	0	1	1	0	0	1	1	1	0	1	1
1	1	0	0	0	1	1	0	0	1	1	1	0	1	1
1	1	1	0	1	1	1	0	0	1	1	1	1	1	1
1	1	1	0	0	1	0	0	0	1	1	1	0	1	1
1	1	1	0	0	1	0	0	0	1	0	1	0	0	1
1	0	0	1	1	1	0	0	1	1	0	1	1	0	1
1	1	0	0	0	0	0	0	0	1	1	1	1	1	1
1	1	0	1	1	0	1	0	0	1	1	1	0	1	1
1	1	0	0	0	1	0	0	0	1	1	1	0	1	1
1	0	0	1	0	0	0	0	0	0	1	1	1	1	1
1	0	0	1	0	0	0	0	1	0	1	1	1	1	1
1	0	0	1	0	0	0	0	0	0	0	1	0	1	1
1	0	0	1	0	0	0	0	1	0	0	1	0	0	1
1	1	0	1	1	0	0	0	1	1	1	1	0	0	1
1	1	0	0	0	1	0	0	0	1	0	1	1	1	1
1	1	1	1	0	0	0	0	0	1	1	1	0	1	1
0	1	0	0	0	0	0	0	1	0	0	1	0	0	0
0	1	1	0	0	0	0	1	0	1	1	1	0	0	1
0	1	1	0	0	0	0	1	0	1	1	1	0	1	0
0	1	1	1	0	0	0	1	0	1	0	1	0	0	1
0	0	0	1	1	0	0	0	0	1	0	1	0	0	1
0	0	0	0	0	1	0	0	1	0	0	1	0	1	0
0	1	0	1	1	1	0	0	0	0	1	1	0	1	0
0	0	0	0	0	1	0	0	0	0	0	1	0	0	0
0	0	0	0	0	1	0	0	0	0	0	1	0	0	0
0	1	1	0	0	0	0	0	0	1	0	1	1	1	0
1	1	0	1	0	0	0	0	0	1	0	1	0	1	1
1	0	0	1	0	1	0	0	0	1	0	1	0	1	1
1	0	0	1	1	0	0	0	0	1	0	1	0	0	1
1	1	1	0	1	0	0	0	0	1	0	1	1	1	1
1	0	0	0	0	1	0	0	0	1	0	1	0	0	1
1	1	1	1	1	0	0	0	1	1	1	1	0	1	1
1	1	1	1	1	0	0	0	1	1	1	1	0	1	1
1	1	0	1	0	1	0	0	0	0	1	1	0	1	1
1	1	0	1	0	1	0	0	0	0	1	1	0	1	1
1	1	0	1	0	1	0	0	0	1	1	1	1	1	1
0	1	1	1	0	0	0	1	0	1	1	1	0	1	0
0	1	1	0	0	0	1	1	0	1	1	1	0	0	0
0	1	1	0	0	1	1	0	0	1	0	1	0	1	1
0	0	0	0	0	1	0	0	0	1	0	0	0	0	0
0	1	1	0	0	0	1	0	0	1	0	1	0	0	0
0	1	1	1	1	0	1	0	1	1	0	1	0	0	1
0	1	1	1	1	1	0	0	1	1	0	1	1	1	1
0	0	0	0	0	1	0	0	0	1	1	1	0	1	0
0	1	1	0	0	1	1	0	1	1	1	0	0	1	1
0	1	0	0	0	1	0	0	0	1	1	0	0	1	0
1	0	0	1	0	1	0	0	0	1	0	1	0	0	1
1	1	1	0	0	0	0	0	0	1	0	1	1	0	1
1	1	0	1	0	0	0	0	0	0	0	1	1	0	1
1	1	1	1	0	1	0	0	0	1	1	1	1	1	1
1	0	0	0	0	0	0	1	0	1	0	1	0	1	1
1	0	0	0	0	0	0	0	0	0	0	1	0	1	1
1	1	1	0	1	0	0	0	0	0	1	1	0	1	1
1	1	0	1	0	0	0	0	0	0	0	1	1	0	1
1	0	0	1	0	0	0	0	0	0	0	1	1	1	1
1	1	0	1	0	1	0	0	1	1	0	1	0	1	1
0	1	1	1	1	1	1	0	0	1	1	1	1	0	1
0	0	0	0	1	1	1	0	0	1	0	1	0	0	1
0	0	0	1	0	0	0	0	0	0	0	1	0	0	1
0	0	0	1	0	0	0	0	0	0	0	1	0	0	1
0	0	0	1	0	0	0	0	1	0	0	1	0	0	1
0	1	0	1	1	0	0	0	1	0	0	1	0	1	0
0	0	0	1	1	0	0	0	0	0	0	1	0	0	1
0	1	1	0	1	0	1	0	1	1	0	0	0	0	0
0	0	0	1	1	1	1	0	1	0	0	0	0	0	0
0	0	0	1	0	0	0	0	0	0	0	1	0	0	1
0	0	0	1	0	0	0	0	0	0	0	1	0	0	1
0	1	1	1	1	1	0	0	1	1	0	1	0	1	1
0	0	0	1	1	0	0	0	0	0	0	1	0	0	0
0	0	0	1	0	1	0	0	1	0	0	1	0	0	1
0	0	0	1	0	0	0	0	1	0	0	1	0	1	0
0	1	1	1	1	1	0	0	1	1	0	1	0	1	1
0	1	1	0	0	0	0	0	0	1	0	1	1	1	0
0	1	0	1	0	0	0	0	0	0	0	1	0	1	0
0	0	0	1	1	1	0	0	0	0	0	1	0	1	0
0	1	0	1	0	1	0	0	0	0	1	1	0	1	1
1	1	1	1	0	0	0	0	0	1	0	1	0	0	1
1	1	1	0	0	0	0	0	0	1	0	1	0	1	1
1	1	1	0	0	0	0	0	0	1	0	1	1	0	1
1	0	0	1	1	0	1	0	0	1	0	1	1	0	1
1	1	1	0	0	0	0	0	0	1	0	1	1	1	1
1	1	0	1	1	1	1	0	0	1	1	1	0	1	1
1	0	0	1	0	0	0	0	0	1	0	1	0	0	1
1	0	0	1	0	0	0	0	0	1	0	1	0	1	1
1	0	0	1	0	0	0	0	0	1	0	1	0	1	1
1	1	0	1	0	0	0	0	1	0	0	1	0	1	1
1	1	1	0	0	1	0	0	1	1	0	1	0	0	1
1	1	1	1	1	0	0	0	0	1	0	1	0	1	1
1	0	0	1	1	0	0	0	1	1	0	1	0	1	1
1	0	0	0	0	0	0	0	0	1	0	1	0	0	1
1	0	0	1	0	0	0	0	0	0	0	1	0	1	1
1	1	1	0	0	1	0	0	0	1	1	1	0	0	1
1	0	0	0	0	0	0	0	1	0	0	1	0	1	1
1	1	1	0	0	0	0	0	1	1	0	1	0	0	1
1	1	0	1	1	0	0	0	0	1	0	1	0	1	1
1	1	0	1	1	0	0	0	0	0	0	1	1	0	1
1	0	0	0	0	0	0	0	0	1	1	1	0	0	1
1	1	1	1	0	0	0	0	0	0	0	1	0	1	1
1	0	0	0	0	0	0	0	0	0	1	1	1	0	1
1	0	0	0	0	0	0	0	0	1	0	1	0	1	1
1	0	0	1	0	0	0	0	0	1	0	1	0	0	1
1	1	1	1	0	0	0	0	0	1	0	1	0	1	1
1	1	1	0	1	1	0	0	1	0	1	1	1	1	1
1	1	0	1	0	1	0	0	0	0	0	1	0	1	1
1	1	0	1	1	1	0	0	0	0	0	1	0	1	0
1	0	0	1	1	0	0	0	0	1	1	1	0	1	1
1	1	1	0	1	1	0	0	0	1	0	1	1	1	1
1	0	0	1	0	0	0	0	0	0	0	1	1	1	1
1	0	0	1	0	1	0	0	0	0	0	1	0	1	1
1	0	0	1	0	0	0	0	0	0	0	1	0	1	1
1	0	0	0	0	0	0	0	0	1	0	1	0	1	1
1	1	0	1	0	0	0	0	0	0	0	1	0	1	1
1	1	1	1	0	0	0	0	1	0	1	1	1	0	1
1	0	0	0	0	0	0	0	1	0	0	1	1	1	1
1	0	0	1	0	0	0	0	1	0	1	1	0	1	1
1	1	1	1	0	1	0	0	0	0	0	1	1	1	1
1	1	0	1	1	1	0	0	0	0	0	1	0	1	1
1	1	0	1	0	1	0	0	0	1	1	1	0	1	1
1	1	0	1	0	0	0	0	0	0	1	1	0	1	1
