# Supplementary material for: Meniscus injury prediction model based on metric learning
Source: PeerJ Comput Sci. 2024 Jul 24;10:e2177. doi: 10.7717/peerj-cs.2177 (PMC11639670; doi:10.7717/peerj-cs.2177)
Supplement: Supplemental Information 3 [file peerj-cs-10-2177-s003.xlsx]

## Sheet: Data original
Specific options	Symptoms\diseases Regular Inquiry（RI） Daily Inquiry（DI） Knee Symptoms（KS） Inspection Assessment（IA） Press Palpation（PP） Special examinations（SE）	(Hospital) June 6, 3 beds Anterior cruciate ligament injury	(Hospital) June 6, 2nd bed Patellar dislocation	(Hospital) June 6, 4 beds Anterior cruciate ligament injury 半月板损伤	(Hospital) June 6, 12 beds General free bodies	(Hospital) June 6 Medial meniscus injury	(Community) Zhou Xiulan To be determined	(Community) Xiong Laizhi arthritis Meniscus injury	(Community) Li Yanmei Mild arthritis Meniscus injury	(Community) Chen Meiying Patellar arthritis Meniscus	(Community) Wei Mingui Mild osteoarthritis	(Community) Luo Tingzhen Patellar arthritis	(Community) Nguyen Cong Meniscus injury	(Community) Sun Guofen Synovitis Osteoporosis To be determined Swelling of the entire joint, tenderness and specific examination are not suitable for conduct	(Community) Li Longju Synovial plica syndrome To be determined	(Community) Zhang Yanping Patellar arthritis	(Community) Zhang Xia Lateral meniscus injury or cartilage injury	(Community) Liu Min Patellar arthritis	(Community) Tian Haiyan Mild osteoarthritis	(Community) Wang Xiaojing Patellar arthritis	(Community) Wang Yangjun Medial meniscus injury	(Community) Liu Fang Patellar arthritis	(Community) Yuan Rong Mild knee arthritis	(Community) Wang Jinlin Severe osteoarthritis Meniscus injury	(Community) Wei Hongjuan Suspected gout To be determined	(Community) Liu Quanxiu Patellar arthritis Osteoarthritis	(Community) Liu Qunying Patellar arthritis Meniscus injury	(Community) Hou Shaohua Degenerative osteoarthritis	(Community) Chen Derong Gout	(Community) Cao Huifen Degenerative osteoarthritis, where does degenerative osteoarthritis hurt?	(Community) Xu Liangcai Lateral meniscus Lateral cartilage injury Meniscus injury	(Community) Cai Linhua Meniscus injury Cartilage injury Fracture	(Community) Li Yibin Meniscus injury	(Community) Mr. Gao (Wang Kexiang's home) Patellar arthritis Lateral meniscus	(Community) Ms. Xin Rheumatism	(Community) Zhang Yulu Osteoarthritis worsens Medial meniscus	20191106 Hospital ward bed 5 Gout crystal stone Anterior cruciate ligament (Special case, crystal stone erodes the anterior cruciate ligament)	20191106 Hospital ward bed 2 Anterior cruciate ligament Injury of medial and lateral meniscus	20191106 Hospital ward bed 3 Posterior cruciate ligament Lateral meniscus	20191106 Add 1 bed to the hospital ward Loose body Osteoarthritis	20191106 Hospital ward 6 beds Lateral meniscus grade 3 Tibial cartilage injury	20191106 Hospital ward bed 4 Meniscus injury	Bed 27 Patellar dislocation	22 beds				47 beds	41 beds
		1	2	3	4	5	6	7	8	9	10	11	12	13	14	15	16	17	18	19	20	21	22	23	24	25	26	27	28	29	30	31	32	33	34	35	36	37	38	39	40	41	42	43	44	45	46	47	48
	Name User/ Name	Anonymous	Zhou Yue	Anonymous	Anonymous	Anonymous	Zhou Xiulan	Xiong Laizhi	Li Yanmei	Chen Meiying	Wei Mingui	Luo Tingzhen	Nguyen Cong	Sun Guofen	Li Longju	Zhang Yanping	Zhang Xia	Liu Min	Tian Haiyan	Wang Xiaojing	Wang Yangjun	Liu Fang	Yuan Rong	Wang Jinlin	Wei Hongjuan	Liu Quanxiu	Liu Qunying	Hou Shaohua	Chen Derong	Cao Huifen	Xu Liangcai	Cai Linhua	Li Yibin	Mr. Gao	Ms. Xin	Zhang Yulu	Huang Bing	Sun Yiqin	Lu Yuan	Tao Youlan	Zhao Peng	Zhang Shulin	Shi Zhihao	Li Dejian	Bai Shuqi	Zheng Chunlan	Guo Chunhua	Zhang Chunrong	Jin Yi
	Contact information	0	18119963911	0	0	18298199738	18356139751		15395678218	17755618091	18788848505	15256999099	18255113301	13856092315	15395113365	18788848909	13329042067	18133625921	17352988025	13955159786	13721093522	18156708799	15375276176	13355518283		13856922751	13856933457	13956907273	18756006113	13515659027	13956980175	13956980385	18655120978	19966471875	13955251797		19956419386	17355497956	13275890032	18326534453		18065648837		15155418460			13514961328	13956658854	18605685016
	Home address Site	0	0	0	0	0			0	0	0																										Shucheng, Lu'an City	Fengtai County, Huainan City	Tongling	Shou County, Huainan				Quanjiao County, Chuzhou City			Baohe District, Hefei City	Baihu Town, Lujiang County, Hefei City	Jieshou City, Fuyang City
1	Doctors team diagnosis	1 01 ACL tear/injury	16 10 Patellar instability/patellar dislocation	1 01 ACL tear/injury	11 06 General free bodies	9 05 Meniscus injury		9 05 Meniscus injury	9 05 Meniscus injury	9 05 Meniscus injury	25 20 Osteoarthritis	12 07 Patellofemoral arthritis	9 05 Meniscus injury		15 09 Synovial plica syndrome	12 07 Patellofemoral arthritis	9 05 Meniscus injury	12 07 Patellofemoral arthritis	25 20 Osteoarthritis	12 07 Patellofemoral arthritis	9 05 Meniscus injury	12 07 Patellofemoral arthritis	25 20 Osteoarthritis	25 20 Osteoarthritis	25 20 Osteoarthritis	12 07 Patellofemoral arthritis	12 07 Patellofemoral arthritis	25 20 Osteoarthritis	39 3 Gouty arthritis Redness, swelling, heat and pain, widespread	25 20 Osteoarthritis	9 05 Meniscus injury	9 05 Meniscus injury	9 05 Meniscus injury	12 07 Patellofemoral arthritis	37 34 Rheumatoid arthritis	25 20 Osteoarthritis	35 Gout Knee Joint Crystal Stone	1 01 Anterior cruciate ligament tear/injury	3 02 Posterior cruciate ligament tear/injury	11 06 General free bodies	9 05 Meniscus injury	9 05 Meniscus injury	16 11 Patellar instability/patellar dislocation	1 01 Anterior cruciate ligament tear/injury	16 11 Patellar instability/patellar dislocation	9 05 Meniscus injury	9 05 Meniscus injury	1 01 Anterior cruciate ligament tear/injury	1 01 Anterior cruciate ligament tear/injury
2				9 05 Meniscus injury				25 20 Osteoarthritis	25 20 Osteoarthritis	12 07 Patellofemoral arthritis		25 20 Osteoarthritis			48 12 Lumbar disc herniation		46 10 Varicose veins	46 10 Varicose veins				46 10 Varicose veins		12 07 Patellofemoral arthritis		25 20 Osteoarthritis	9 05 Meniscus injury							9 05 Meniscus injury		9 05 Meniscus injury	3 02 Posterior cruciate ligament tear/injury	9 05 Meniscus injury	9 05 Meniscus injury	25 20 Osteoarthritis				9 05 Meniscus injury	9 05 Meniscus injury	25 20 Osteoarthritis	25 20 Osteoarthritis	25 20 Osteoarthritis	25 20 Osteoarthritis
3																																						48 12 Lumbar disc herniation							11 06 General free bodies
4
5
		1	2	3	4	5	6	7	8	9	10	11	12	13	14	15	16	17	18	19	20	21	22	23	24	25	26	27	28	29	30	31	32	33	34	35	36	37	38	39	40	41	42	43	44	45	46	47	48
Male	Gender: Sex	1	0	0	0	1	0	0	0	0	0	0	0	0	0	0	0	0	0	0	1	0	0	1	0	0	0	0	1	0	1	0	1	1	0	0	1		1		1		1	1					1
Female		0	1	1	1	0	1	1	1	1	1	1	1	1	1	1	1	1	1	1	0	1	1	0	1	1	1	1	0	1	0	1	0	0	1	1		1		1		1			1	1	1	1
	Age		14																																		23	46	28	53	20	57	15	29	15	56	54	46	40
Under 15 years old	Age, please refer to the instruction manual of knee joint for different age groups. RI_Age	40	1	49	18	51	68	56	64	56	56	66	65	75	57	53	53	61	62	44	63	57	55	65	56	57	55	53	71	62	44	42	33	75	58	61
15-30 years old		0	0	0	0	0	0	0	0	0	0	0	0	0	0	0	0	0	0	0	0	0	0	0	0	0	0	0	0	0	0	0	0	0	0	0	1		1
31-40 years old		0	0	0	0	0	0	0	0	0	0	0	0	0	0	0	0	0	0	0	0	0	0	0	0	0	0	0	0	0	0	0	0	0	0	0
41-50 years old		0	0	0	0	0	0	0	0	0	0	0	0	0	0	0	0	0	0	0	0	0	0	0	0	0	0	0	0	0	0	0	0	0	0	0		1
51-60 years old		0	0	0	0	0	0	0	0	0	0	0	0	0	0	0	0	0	0	0	0	0	0	0	0	0	0	0	0	0	0	0	0	0	0	0				1
61-70 years old		0	0	0	0	0	0	0	0	0	0	0	0	0	0	0	0	0	0	0	0	0	0	0	0	0	0	0	0	0	0	0	0	0	0	0
Over 70 years old		0	0	0	0	0	0	0	0	0	0	0	0	0	0	0	0	0	0	0	0	0	0	0	0	0	0	0	0	0	0	0	0	0	0	0
	Height RI_Stature	163	165	160	163	180	150	160	160	160	163	158	150	149		163	160	161	156	167	171	163	156	165	155	165	167	164	176	153	173	168	168	174	160	165	181	155	174	160	185	160		177			167	150	170
	body weight RI_Weight	75	71	61	68	75	64	62	67	57	54	60	58	53		50	52	50	54	65	62	55	58	62	54	56	74	62	64	58	72	67	65	74	75	75	90	65	76	54	71	70		83			65	55	90
<18.5 Underweight (malnutrition)	BMI(weight/height squared), see the Body Mass Index Classification Standard for details RI_BMI	0	0	0	0	0	0	0	0	0	0	0	0	0	0	0	0	0	0	0	0	0	0	0	0	0	0	0	0	0	0	0	0	0	0	0
18.5-24.9 Normal range		0	0	0	0	0	0	0	0	0	0	0	0	0	0	0	0	0	0	0	0	0	0	0	0	0	0	0	0	0	0	0	0	0	0	0
>=25 Overweight		0	0	0	0	0	0	0	0	0	0	0	0	0	0	0	0	0	0	0	0	0	0	0	0	0	0	0	0	0	0	0	0	0	0	0
25-29.9 Pre-obesity state		0	0	0	0	0	0	0	0	0	0	0	0	0	0	0	0	0	0	0	0	0	0	0	0	0	0	0	0	0	0	0	0	0	0	0
30-34.9 First-level obesity		0	0	0	0	0	0	0	0	0	0	0	0	0	0	0	0	0	0	0	0	0	0	0	0	0	0	0	0	0	0	0	0	0	0	0
35-39.9 Second-level obesity		0	0	0	0	0	0	0	0	0	0	0	0	0	0	0	0	0	0	0	0	0	0	0	0	0	0	0	0	0	0	0	0	0	0	0
>=40 Third-level obesity		0	0	0	0	0	0	0	0	0	0	0	0	0	0	0	0	0	0	0	0	0	0	0	0	0	0	0	0	0	0	0	0	0	0	0
Remarks	Work/Career Explore the cause of knee joint condition, which can be the work before retirement or the main job RI_Work	takeout	student	housewife	student	Physical work	family	housework	teacher		housework	housework	Cleaning	office		housework	Make snacks	housework		office	retire	retire	Teacher, housework	Moving, retirement chores	Sitting and working, housework	housework		retire	retire	housework		Freelance	office	retire	Bringing Children	Farming	teacher	Farming	Staff	Farming	student	Farming					Sole proprietorship	Farmers	individual
Mild, such as office workers		0	1	0	0	0	0	0	0	0	0	0	0	0	0	0	0	0	0	0	0	0	0	0	0	0	0	0	0	0	0	0	0	0	0	0
Moderate, such as teachers		1	0	0	0	0	0	0	0	0	0	0	0	0	0	0	0	0	0	0	0	0	0	0	0	0	0	0	0	0	0	0	0	0	0	0
Severe, such as workers		0	0	0	0	0	0	0	0	0	0	0	0	0	0	0	0	0	0	0	0	0	0	0	0	0	0	0	0	0	0	0	0	0	0	0
Overweight, such as athletes		0	0	0	0	0	0	0	0	0	0	0	0	0	0	0	0	0	0	0	0	0	0	0	0	0	0	0	0	0	0	0	0	0	0	0
1. Left knee	Which knee is uncomfortable? RI_Part	0	0	0	1	1	0	0	0	0	0	0	0	1	0	1	1	1	0	0	1	0	0	0	0	0	0	0	0	0	1	1	1	0	0	0			1				1				1
2.Right knee		1	1	0	0	0	0	0	0	0	0	0	1	0	0	0	0	0	0	1	0	1	1	1	1	0	0	0	0	0	0	0	0	0	0	0	1	1		1	1	1		1	1			1	1
3. Both knees		0	0	1	0	0	1	1	1	1	1	1	0	0	1	0	0	0	1	0	0	0	0	1	0	1	1	1	1	1	0	0	0	1	1	1										1
1. History of lower limb fracture, trauma or knee surgery	Special medical history RI_MH	0	0	0	0	0	0	0	1	0	0	0	0	0															1					1										1					1
2. Knee puncture		0	0	0	0	0	0	0	1	0	0	0	0	0																						1
3. Gout or high uric acid		0	0	0	0	0	0	0	0	0	0	0	0	0											1				1								1
4. Rheumatism		0	0	0	0	0	0	0	0	0	0	0	0	0
5. Rheumatoid arthritis		0	0	0	0	0	0	0	0	0	0	0	0	0																					1													1
6. Diabetes		0	0	0	0	0	1	0	0	0	0	0	0	0
7. Skin disease		0	0	0	0	0	0	0	0	0	0	0	0	0							1
8. Pulmonary or other tuberculosis		0	0	0	0	0	0	0	0	0	0	0	0	0
9. Lumbar disc herniation		0	0	1	0	0	1	0	0	0	1	0	0	0									1					1		1																1		1
10. Ankylosing spondylitis		0	0	0	0	0	0	0	0	0	0	0	0	0
11. Hip disease		0	0	0	0	0	0	0	0	0	0	0	0	0
12. Ankle disease		0	0	0	0	0	0	0	1	0	0	0	0	0
13. Foot disease		0	0	0	0	0	0	0	0	0	0	0	0	0
14.Others		0	0	0	0	0	0	0	0	0	0	0	0	0
Other illnesses																																							Right knee cruciate ligament reconstruction				Medial humeral condyle fracture (see questionnaire for details)	Traumatic history: sprain while playing ball		Wrist joint (see questionnaire for details)
1. Fever	Current typical physical symptoms RI_Sym	0	0	0	0	0	0	0	0	0	0	0	0
2. Localized fever in the knee joint		0	0	0	1	0	0	0	0	0	0	0	0																								1		1				1	1	1			1
3.Fatigue/fatigue/limb weakness		0	0	0	0	0	0	1	0	0	0	0	0				1				1						1																					1
4.Short stature, hunchback		0	0	0	0	0	0	0	0	0	0	0	0	1		1	1							1
5.Waist pain		0	0	0	0	0	1	1	1	0	1	1	0		1	1							1				1			1
6.Radiating pain/numbness in lower limbs		0	0	0	0	0	1	0	0	1	0	0	0		1														1									1
7.Migratory pain throughout the body		0	0	0	0	0	0	0	0	0	0	0	0	0		0	0	0	0	0	0	0	0	0	0	0	0	0	0	0	0	0	0	0	0	0												1
8.Sacroiliac joint pain (thigh root)		0	0	0	0	0	0	0	0	0	0	0	0																	1
9.Multiple joint/symmetrical/persistent swelling		0	0	0	0	0	0	0	0	0	0	0	0													1			1																			1
10.Joint swelling often occurs in the first metatarsophalangeal joint or finger joints		0	0	0	0	0	0	0	0	0	0	0	0																1																			1
11.Local vermiform blood vessels can be seen		0	0	0	0	0	1	0	0	0	0	0	0				1	1				1		1
12.Morning stiffness/hand stiffness for more than half an hour		0	0	0	0	0	0	0	0	0	0	0	0	0				0	0	0	0	0	0	0	0	0	0	0	0	0	0	0	0	0	1	0
13.Other		0	0	0	0	0	0	0	0	0	0	0	0																																	1
Other symptoms
1.Have	Knee Injury RI_Inj	1	1	1	1	0	0	0	0	0	0	0	0							1	1											1	1						1		1		1	1	1			1	1
2.None		0	0	0	0	1	1	1	1	1	1	1	1	1	1	1		1	1			1	1	1	1	1	1	1	1	1	1			1		1				1		1				1	1		1
3.There may be minor injuries, but they will heal soon and there is no special impression.		0	0	0	0	0	0	0	0	0	0	0	0				1
4.Multiple cumulative injuries		0	0	0	0	0	0	0	0	0	0	0	0	0	0	0	0	0	0	0	0	0	0	0	0	0	0	0	0	0	0	0	0	0	0	0	1	1
Other injuries
1.Six weeks ago	(Extended question) Time of occurrence RI_Inj_Time	1	0	1	1	0	0	0	0	0	0	0	0																			1												1
2.Within six weeks		0	0	0	0	0	0	0	0	0	0	0	0							1																			1
3.Within a week		0	1	0	0	0	0	0	0	0	0	0	0																				1								1		1		1			1	1
1.Sports injuries (such as injuries while playing ball or soccer)	(Extended question) Damage type Brief description of the damage RI_Inj_ Type	0	0	0	1	0	0	0	0	0	0	0	0								1																		1		1
2.Sprains caused by oneself (such as when walking up or down stairs)		0	1	1	0	0	0	0	0	0	0	0	0																				1
3.Minor car accident and other violent injuries		1	0	0	0	0	0	0	0	0	0	0	0
4.Fall and Injury		0	0	1	0	0	0	0	0	0	0	0	0
5.Other		0	0	0	0	0	0	0	0	0	0	0	0
Other injuries																																Jogging leads to
1.Inability to walk after injury	(Extended question) Can you continue to walk and move after the injury? RI_Inj_ Act	0	1	0	0	0	0	0	0	0	0	0	0																															1	1			1	1
2.Being able to walk after an injury		1	0	1	1	0	0	0	0	0	0	0	0							1	1											1	1						1		1		1
3.The patient could walk for a while at the time of the injury, but soon became unable to walk.		0	0	0	1	0	0	0	0	0	0	0	0
4.Uncertainty or situation		0	0	0	0	0	0	0	0	0	0	0	0
Other sports after injury
1.There is a sound	(Extended question) Damage sound RI_Inj_ Snap	1	0	1	0	0	0	0	0	0	0	0	0							1																									1
2.No sound		0	0	0	0	0	0	0	0	0	0	0	0																				1						1				1	1
3.uncertain		0	1	0	1	0	0	0	0	0	0	0	0								1											1									1							1	1
1.Normal activities	Is knee joint movement restricted? RI_Lim	1	0	1	1	0	1	0	1	1	1	1	1		1	1	1	1	1	1	1	1	1	1	1	1	1	1			1			1		1		1		1		1		1		1	1	1
2.Cannot bend completely		0	0	0	0	1	0	1	0	0	0	0	0	1																			1				1		1				1		1				1
3.Cannot fully straighten		0	0	0	0	0	0	1	0	0	0	0	0																								1				1								1
1.There is a sound	Do you hear snapping sounds in your knee joint when you are doing activities such as walking, squatting, or going up and down stairs?	1	1	1	1	1	0	1	0	1	1	1	0	1	1			1	1	1	1	1	1	1	1		1	1		1	1	1		1		1			1	1	1	1		1		1	1
2.No sound		0	0	0	0	0	1	0	1	0	0	0	1			1	1																				1	1					1		1			1	1
3.uncertain		0	0	0	0	0	0	0	0	0	0	0	0													1
1.Inside of knee joint;	(Extended question) The location where the sound is emitted RI_Snap_Part	0	0	0	0	0	0	0	0	0	0	0	0		1			1						1																							1
2.The outside of the knee joint;		0	0	0	0	0	0	0	0	0	0	0	0
3.Front of knee joint;		1	0	0	0	0	0	1	0	1	0	1	0									1			1							1		1					1	1
4.Inside and above the knee joint;		0	0	0	0	0	0	0	0	0	0	0	0								1
5.Inside the knee joint, but the exact location is unclear;		0	1	1	1	1	0	0	0	0	1	0	0						1	1			1				1	1		1	1					1					1	1
1.A friction sound similar to "rustling";	(Extended question) Sound type RI_Snap_Type	0	0	0	0	0	0	0	0	0	0	1	0									1					1
2.A crisp sound similar to "click-click";		1	1	1	1	0	0	0	0	1	0	0	0								1		1	1				1						1		1			1	1				1		1	1
3.Similar to the sound of "click, click";		0	0	0	0	1	0	1	0	0	1	0	0	1	1			1		1					1		1				1					1
4.Other or Unsure		0	0	0	0	0	0	0	0	0	0	0	0																	1		1										1
Other sound conditions
1.You can hear it at every event	(Extended question) The time when the sound occurred RI_Snap_Time	0	1	0	1	0	0	1	0	0	0	1	0								1	1	1		1									1		1
2.Frequent/regular		0	0	0	0	0	0	0	0	0	0	0	0	1						1																			1
3.Occasionally/Rarely		1	0	1	0	1	0	0	0	1	1	0	0		0			1	1					1			1	1		1	1	1								1	1	1		1		1	1
1.Normal/no stuck feeling	Does the joint feel like it is stuck by a foreign body (locking feeling/locked feeling), such as the knee joint suddenly gets stuck and cannot move when walking, but can walk again after a slight shake.	1	1	1	0	1	1	1	1	1	1	0	1		1		1	1	1		1	1	1	1	1	1	1	1	1		1		1	1		1		1			1	1	1	1	1	1	1	1
2.Occasionally, interlocking occurs		0	0	0	1	0	0	0	0	0	0	1	0	1						1										1		1							1
3.Interlocking often occurs		0	0	0	0	0	0	0	0	0	0	0	0																											1
4.The knee joint is stuck and cannot move at all		0	0	0	0	0	0	0	0	0	0	0	0																								1
1.The knee joint suddenly becomes weak during activities, causing the person to kneel down or fall.	Is there any instability in the knee joint (weak legs)? RI_Inst	1	0	1	0	0	1	0	0	0	0	0	0	1	1	1					1			1									1				1	1							Inability to walk	Squat down and stand up to soften		1	1
2.Stable and normal activities		0	0	0	0	0	0	0	1	1	0	1	1						1	1		1	1		1	1	1	1	1		1	1		1		1			1	1		1	1	1			1
3.uncertain		0	0	0	1	1	0	1	0	0	1	0	0				1	1												1											1
1.No sense of dislocation	Does your knee feel out of place/slipping now or when it was injured?																																										1	1	1	1
2.There is left-right misalignment		1		1																																	1	1	1										1
3.There is front-to-back misalignment		1		1																																	1	1	1										1
4.Uncertain or other situations		1		1																																											1
Other cases
1.There is a sense of dislocation	Is there a sense of dislocation of the patella at the time of injury or currently? RI_PD	0	1	0	0	0	0	0	0	0	0	0	0																														1
2.No sense of dislocation		1	0	1	1	1	1	1	1	1	1	1	1	1	1	1	1	1	1	1	1	1	1	1	1	1	1	1	1	1	1	1	1	1		1	1	1	1	1	1	1		1	1			1	1
3.uncertain		0	0	0	0	0	0	0	0	0	0	0	0																																	1	1
1.No stiffness or "stickiness"	Is there any stiffness in the knee joint? RI_Sti	1	1	1	1	1	0	0	0	1	1	1	1	1	1	1	1	1	1		1	1	1		1				1				1	1		1	1	1	1	1	1	1	1	1	1	1	1	1
2.Stiffness in the morning lasts no longer than 30 minutes		0	0	0	0	0	0	0	0	0	0	0	0															1
3.Stiffness in the morning lasts for more than 30 minutes		0	0	0	0	0	0	0	0	0	0	0	0
4.Stiffness after sitting, lying down, or resting during the day		0	0	0	0	0	0	0	0	0	0	0	0							1						1				1	1																		1
5.Stiffness after activities such as walking		0	0	0	0	0	1	1	1	0	0	0	0														1	1				1
1.Normal	Compare the two sides of the knee joint to see if the affected limb becomes thinner
2.The affected limb becomes thinner and atrophied						0	0	1	0	0	0	0	0											1			1										1									1
3.Uncertain or other situations
Other atrophy conditions
1.Normal	Comparison of both sides, thigh circumference and knee joint status PP_Mea					1	1	0	1	0	1	1	1		1	1	1	1	1	1	1	1	1		1	1		1		1	1		1	1		1		1				1					1	1
2.Swelling of the entire joint						0	0	0	0	0	0	0	1	1
3.Local swelling						0	1	1	0	1	0	0	0														1		1			1							1	1	1		1	1	1
4.Uncertain or other situations
Other swelling
1.Short time (about 2 hours), large amount, high tension	(Extended question) Swelling status (multiple choices) PP_Mea_Sta	0	0	0	0	0	0	0	0	0	0	0	0																														1						1
2.Swelling occurs slowly, around 24, mild to moderate		0	0	0	0	0	0	0	0	0	0	0	0																										1		1			1	1			1
3.Recurring after activity, relieved by rest		0	0	0	0	0	0	1	0	0	0	0	0																								1			1
4.Persistent swelling		0	1	0	0	0	0	0	0	1	0	0	0	1													1					1
5.Uncertain or other situations		0	0	0	1	0	0	0	0	0	0	0	0
Other cases																																													(not obvious)
1.Swelling of the tibial tubercle	(Extension problem) Swelling location PP_Mea_Part	0	0	0	0	0	0	0	0	0	0	0	0																																			(See the questionnaire for details)	(See the questionnaire for details)
2.Anterior patellar bulge		0	0	0	0	0	1	0	0	1	0	0	0
3.Patellar protrusion		0	0	0	0	0	0	0	0	1	0	0	0																								1		1						1 (See questionnaire for details)
4. Anterior of the patellar tendon		0	0	0	0	0	0	0	0	0	0	0	0
5. Swelling of fat pads on both sides of the patellar tendon		0	0	0	0	0	0	0	0	0	0	0	0
6. Localized swelling in the joint space		0	0	0	0	0	0	1	0	1	0	0	0														1					1									1
7. Swelling of the medial femoral condyle		0	0	0	0	0	0	0	0	0	0	0	0
8. Swelling of the lateral tibial condyle		0	0	0	0	0	0	0	0	0	0	0	0
9. Lateral tumor		0	0	0	0	0	0	0	0	0	0	0	0
10. Swelling in the popliteal fossa behind the joint		0	0	0	0	0	0	0	0	0	0	0	0
11. Uncertainty or other situations
Other cases
																																											(See the questionnaire for details)	(See the questionnaire for details)
1. Yes	Is there a mass or swelling that can be felt around the knee joint? PP_PM	0	0	0	1	0	0	1	0	0	0	0	0												1											1				1
2. None		1	1	1	0	1	1	0	1	1	1	1	1		1	1	1	1	1	1	1	1	1	1		1		1	1	1	1		1	1			1	1	1		1	1	1	1	1	1		1	1
3. Uncertainty or other situations		0	0	0	0	0	0	0	0	0	0	0	0	1																		1
Other cases
1. Anterior knee, tibial tuberosity	(Extension problem) The part of the knee where the lump can be felt PP_PM_Part	0	0	0	0	0	0	0	0	0	0	0	0	0	0	0	0	0	0	0	0	0	0	0	0	0	0	0	0	0	0	0	0	0	0	0											(See the questionnaire for details)
2. Anterior part of the knee, upper edge of the patella		0	0	0	0	0	0	0	0	0	0	0	0	0	0	0	0	0	0	0	0	0	0	0	0	0	0	0	0	0	0	0	0	0	0	0
3. Anterior part of the knee, patellar surface		0	0	0	0	0	0	0	0	0	0	0	0	0	0	0	0	0	0	0	0	0	0	0	0	0	0	0	0	0	0	0	0	0	0	0
4. Anterior part of the knee, medial edge of the patella		0	0	0	0	0	0	0	0	0	0	0	0	0	0	0	0	0	0	0	0	0	0	0	0	0	0	0	0	0	0	0	0	0	0	0
5. Anterior part of the knee, lateral edge of the patella		0	0	0	0	0	0	0	0	0	0	0	0	0	0	0	0	0	0	0	0	0	0	0	0	0	0	0	0	0	0	0	0	0	0	0
6. Anterior part of the knee, both sides of the patellar ligament		0	0	0	0	0	0	0	0	0	0	0	0	0	0	0	0	0	0	0	0	0	0	0	0	0	0	0	0	0	0	0	0	0	0	0
7. Anterior knee, patellar tip and patellar ligament		0	0	0	0	0	0	0	0	0	0	0	0	0	0	0	0	0	0	0	0	0	0	0	0	0	0	0	0	0	0	0	0	0	0	0
8. Anterior part of the knee, medial to the joint line plane		0	0	0	0	0	0	1	0	0	0	0	0	0	0	0	0	0	0	0	0	0	0	0	0	0	0	0	0	0	0	0	0	0	0	0				1
9. Anterior part of the knee, lateral to the joint line plane		0	0	0	0	0	0	0	0	0	0	0	0	0	0	0	0	0	0	0	0	0	0	0	0	0	0	0	0	0	0	0	0	0	0	0
1. Lateral part of the knee, at the fibula head		0	0	0	0	0	0	0	0	0	0	0	0	0	0	0	0	0	0	0	0	0	0	0	0	0	0	0	0	0	0	0	0	0	0	0
2. Lateral part of the knee, lateral epicondyle of the femur		0	0	0	0	0	0	0	0	0	0	0	0	0	0	0	0	0	0	0	0	0	0	0	0	0	0	0	0	0	0	0	0	0	0	0
3. Lateral part of the knee, lateral collateral ligament		0	0	0	0	0	0	0	0	0	0	0	0	0	0	0	0	0	0	0	0	0	0	0	0	0	0	0	0	0	0	0	0	0	0	0
4. Lateral knee, iliotibial band attachment point (Gerdy tubercle)		0	0	0	0	0	0	0	0	0	0	0	0	0	0	0	0	0	0	0	0	0	0	0	0	0	0	0	0	0	0	0	0	0	0	0
5. Lateral knee, iliotibial band area		0	0	0	0	0	0	0	0	0	0	0	0	0	0	0	0	0	0	0	0	0	0	0	0	0	0	0	0	0	0	0	0	0	0	0
6. Lateral knee, joint line plane		0	0	0	0	0	0	0	0	0	0	0	0	0	0	0	0	0	0	0	0	0	0	0	0	0	0	0	0	0	0	0	0	0	0	0
1. Medial knee, medial tibial tuberosity, anserine foot		0	0	0	0	0	0	0	0	0	0	0	0	0	0	0	0	0	0	0	0	0	0	0	0	0	0	0	0	0	0	0	0	0	0	0
2. Medial side of the knee, medial collateral ligament		0	0	0	0	0	0	0	0	0	0	0	0	0	0	0	0	0	0	0	0	0	0	0	0	0	0	0	0	0	0	0	0	0	0	0
3. Medial side of knee, medial femoral condyle		0	0	0	0	0	0	0	0	0	0	0	0	0	0	0	0	0	0	0	0	0	0	0	0	0	0	0	0	0	0	0	0	0	0	0
4. Medial knee, joint line plane		0	0	0	0	0	0	0	0	0	0	0	0	0	0	0	0	0	0	0	0	0	0	0	0	0	0	0	0	0	0	0	0	0	0	0
1. The back of the knee, popliteal fossa		0	0	0	0	0	0	0	0	0	0	0	0	0	0	0	0	0	0	0	0	0	0	0	0	0	0	0	0	0	0	0	0	0	0	0
2. Posterior part of the knee, posteromedial part of the joint plane		0	0	0	0	0	0	0	0	0	0	0	0	0	0	0	0	0	0	0	0	0	0	0	0	0	0	0	0	0	0	0	0	0	0	0
3. Posterior part of the knee, posterolateral part of the joint plane		0	0	0	0	0	0	0	0	0	0	0	0	0	0	0	0	0	0	0	0	0	0	0	0	0	0	0	0	0	0	0	0	0	0	0
Unsure or other ____________		0	0	0	1	0	0	0	0	0	0	0	0																											1
Other cases		0	0	0	0	0
1.Have	Is there pain in or around the knee joint? PP_Ache	0	1	1	1	1	1	1	1	1	1	1	1	1	1	1	1	1	1	1	1	1	1	1	1	1	1	1	1	1	1	1	1	1		1	1	1	1	1	1	1	1	1	1		1
2.None		1	0	0	0	0	0	0	0	0	0	0	0																																				1
1. Persistent pain	(1 Extended question) Knee pain onset time and duration PP_Ache_Time	0	0	0	0	1	0	1	1	1	0	0	0	1											1		1									1		1				1							1
2. Pain after walking far away		0	0	0	0	0	0	0	0	0	1	1	0				1		1	1	1	1		1				1			1		1						1
3. Knee pain		0	0	0	0	0	0	0	0	0	0	0	0	0	0	0	0	0	0	0	0	0	0	0	0	0	0	0	0	0	0	0	0	1	0	0		1										1
4. Knee joint swelling and pain		0	0	0	0	0	0	0	0	0	0	0	0	0	0	0	0	0	0	0	0	0	0	0	0	0	0	0	0	0	0	0	0	0	0	0							1		1			1
5. Knee joint pain increases when exposed to cold		0	0	0	0	0	0	0	0	0	0	0	0	0	0	0	0	0	0	0	0	0	0	0	0	0	0	0	0	0	0	0	0	0	0	0
6. Pain that worsens after activity and eases after rest		0	0	1	0	0	1	0	0	0	0	0	1		1		1				1		1	1	1						1	1	1	1			1			1	1			1		1	1
7. Worsens after rest and relieved after activity		0	1	0	0	0	0	0	0	0	0	0	0		0											1		1
8. Uncertainty or other situations
Other cases
1. Hyperextension pain, equivalent to hyperextension test	(1 Extended question) Pain in specific body positions PP_Ache_Pos	0	0	1	0	0	0	1	1	1	0	0	1														1						1			1		1							(See the questionnaire for details)
2. Hyperflexion pain, equivalent to hyperflexion test		0	0	1	0	1	1	0	1	1	0	0		1		1	1					1				1	1			1			1	1		1	1	1	1		1	1		1		1	1	1	1
3. Pain on the outside of the knee increases when the knee is flexed 30 degrees (iliotibial band syndrome)		0	0	0	0	0	0	0	0	0	0	0	0	0	0	0	0	0	0	0	0	0	0	0	0	0	0	0	0	0	0	0	0	0	0	0
4. Pain on the medial side of the knee increases when the knee is flexed 45 degrees (synovial plica syndrome)		0	0	0	0	0	0	0	0	0	0	0	0	0	1	0	0	0	0	0	0	0	0	0	0	0	0	0	0	0	0	0	0	0	0	0
5. Uncertainty or other situations		0	0	0	0	0	0	0	0	0	1	1	0		0					1			1					1												1
Other cases
Standing → No pain (0)	(1 Extended question) Pain and degree of activity PP_Ache_Deg	0	0	0	0	0	1	0	0	0	0	1	0									1						1		1	1	1	1	1						1				1			1
Standing → Slight (1)		0	0	0	0	0	0	1	1	1	1	0	1		1									1			1									1	1		1							1
Standing → Medium (2)		0	0	0	0	0	0	0	0	0	0	0	0	1											1
Standing → Severe (3)		0	0	0	0	1	0	0	0	0	0	0	0
Walking on flat ground → no pain (0)		0	0	0	0	0	0	0	0	0	0	0	0			1						1									1	1		1				1						1			1
Walking on flat ground → Slight (1)		0	0	1	0	0	0	0	1	0	1	1	1		1											1	1	1		1			1			1	1		1	1						1
Flat Walking → Moderate (2)		0	1	0	0	0	1	0	0	1	0	0	0											1
Walking on flat ground → Severe (3)		0	0	0	0	1	0	1	0	0	0	0	0	1											1
Sleeping in bed → No pain (0)		0	1	0	0	0	1	0	0	1	0	1	1			1						1				1	1	1			1	1	1	1			1		1	1				1		1	1
Sleeping in bed → Mild (1)		0	0	0	0	1	0	0	1	0	0	0	0	1	1									1						1						1												1	1
Sleeping in bed → Medium (2)		0	0	0	0	0	0	1	0	0	1	0	0												1
Sleeping in bed → Severe (3)		0	0	0	0	0	0	0	0	0	0	0	0
Sitting or lying down → No pain (0)		0	0	0	0	0	1	0	0	0	0	1	1			1						1				1	1	1		1	1	1	1	1			1		1	1				1		1	1
Sitting or lying down → Mild (1)		0	1	0	0	0	0	1	1	1	1	0	0	1	1																					1												1	1
Sitting or lying → Medium (2)		0	0	0	0	1	0	0	0	0	0	0	0
Sitting or lying down → Severe (3)		0	0	0	0	0	0	0	0	0	0	0	0												1
Strenuous activity → No pain (0)		0	0	0	0	0	0	0	0	0	0	0	0
Vigorous activity → Mild (1)		0	0	0	0	0	0	0	0	0	0	1	0			1							1											1		1
Vigorous activity → Moderate (2)		0	0	0	0	0	1	0	1	0	1	0	1		1		1		1	1		1						1		1	1	1	1							1				1			1
Strenuous activity → Severe (3)		0	0	0	0	1	0	1	0	1	0	0	0	1										1	1	1	1										1		1							1
1. Anterior knee, tibial tuberosity	(Extension problem) Tenderness point on the front of the knee joint PP_Ten_Ant	0	0	0	0	0	0	0	0	0	0	0	0
2. Anterior part of the knee, upper edge of the patella		0	0	0	0	0	0	1	0	0	0	0	0
3. Anterior part of the knee, patellar surface		0	0	0	0	0	0	0	0	1	0	1	0	0		1		1	1	1		1				1	1							1
4. Anterior part of the knee, medial edge of the patella		0	0	0	0	0	0	0	0	0	0	0	0		1										1
5. Anterior part of the knee, lateral edge of the patella		0	0	0	0	0	0	0	0	0	0	0	0																								1
6. Anterior part of the knee, both sides of the patellar ligament		0	0	0	0	0	0	0	0	0	0	0	0												1
7. Anterior knee, patellar tip and patellar ligament		0	0	0	0	0	0	0	0	0	0	0	0			1
8. Anterior part of the knee, medial to the joint line plane		0	1	0	0	1	0	1	1	1	0	0	1						1		1		1	1	1		1	1				1	1			1		1		1		1
9. Anterior part of the knee, lateral to the joint line plane		0	0	1	0	0	0	1	1	1	0	0	1				1		1				1	1	1		1	1			1	1		1		1		1	1	1	1	1
1. Lateral part of the knee, at the fibula head	(Extension problem) Tenderness point on the outside of the knee joint PP_Ten _Outs	0	0	0	0	0	0	0	0	0	0	0	0
2. Lateral part of the knee, lateral epicondyle of the femur		0	0	0	0	0	0	0	0	0	0	0	0																								1	1							1
3. Lateral part of the knee, lateral collateral ligament		0	0	0	0	0	0	0	0	0	0	0	0
4. Lateral knee, iliotibial band attachment point (Gerdy tubercle)		0	0	0	0	0	0	0	0	0	0	0	0	0	0	0	0	0	0	0	0	0	0	0	0	0	0	0	0	0	0	0	0	0	0	0
5. Lateral knee, iliotibial band area		0	0	0	0	0	0	0	0	0	0	0	1	0	0	0	0	0	0	0	0	0	0	0	0	0	0	0	0	0	0	0	0	0	0	0
6. Lateral knee, joint line plane		0	0	0	0	0	0	1	1	1	1	0	0	0	0	0	1	0	0	0	0	0	1	1	0	0	0	0	0	0	1	0	0	0	0	0		1	1		1								1
1. Medial knee, medial tibial tuberosity, anserine foot	(Extension problem) Tenderness point on the inner side of the knee joint PP_Ten_Ins	0	0	0	0	0	0	0	0	0	0	0	0	0	0	0	0	0	0	0	0	0	0	0	0	0	0	0	0	0	0	0	0	0	0	0											1
2. Medial side of the knee, medial collateral ligament		0	0	0	0	0	0	0	0	0	0	0	0	0	0	0	0	0	0	0	0	0	0	0	0	0	0	0	0	0	0	0	0	0	0	0
3. Medial side of knee, medial femoral condyle		0	0	0	0	0	0	0	0	0	0	0	0	0	1	0	0	0	0	0	0	0	0	0	0	0	0	0	0	0	0	0	0	0	0	0	0						1		1			1
4. Medial knee, joint line plane		0	0	0	0	1	0	1	1	1	1	0	1	0	0	0	0	0	0	0	1	0	0	1	0	0	0	0	0	0	0	0	1	0	0	0		1					1	1		1	1		1
1. The back of the knee, popliteal fossa	(Extension problem) Tenderness point at the back of the knee joint PP_Ten_Post	0	0	0	0	0	0	0	0	0	0	0	0	0	0	0	0	0	0	0	0	0	0	0	0	0	0	0	0	0	0	0	0	0	0	0
2. Posterior part of the knee, posteromedial part of the joint plane		0	0	0	0	0	0	1	0	0	0	0	0	0	0	0	0	0	0	0	0	0	0	0	0	0	0	0	0	0	0	0	0	0	0	0
3. Posterior part of the knee, posterolateral part of the joint plane		0	0	0	0	0	0	1	0	0	0	0	0	0	0	0	0	0	0	0	0	0	0	0	0	0	0	0	0	0	0	0	0	0	0	0
Unsure or other ____________
Other cases
1. Yes	Have you exercised too much or been overworked recently? DI_Over	0	0	0	1	0	0	0	1	0	0	0	1				1				1																1	1	1	1
2. None		1	1	1	0	1	1	1	0	1	0	1	0	1		1		1	1	1			1	1	1	1	1	1		1	1	1	1	1		1						1	1	1	1	1	1	1	1
3. Uncertainty		0	0	0	0	0	0	0	0	0	1	0	0
1. Excessive exercise, such as running more than 4 times a week for more than 30 minutes each time	(Extended question) Over-exercise and over-exertion DI_Over_ Part	0	0	0	1	0	0	0	0	0	0	0	0								1																		1
2. Physical labor that exceeds previous workload, such as lifting heavy objects, going up and down stairs repeatedly, squatting, etc.		0	0	0	0	0	0	0	1	0	0	0	1																									1		1
3. Not very clear. Although I have maintained my usual workload recently, I still feel physically and mentally exhausted.		0	0	0	0	0	0	0	0	0	1	0	0				1																				1
4. Others		0	0	0	0	0	0	0	0	0	0	0	0
Standing for a long time → more than two hours	Daily use of knee joint DI_Use	0	0	0	0	0	0	0	0	0	0	0	0														1											1
Long standing → more than one hour DI_Use_12		0	0	0	1	1	0	1	1	0	1	1	1	1		1	1			1																	1					1
Standing for a long time → more than half an hour		0	0	0	0	0	0	0	0	1	0	0	0					1								1										1			1
Standing for a long time → Occasionally occurs		1	1	1	0	0	1	0	0	0	0	0	0																	1
Sedentary → Two hours or more DI_Use_21		0	0	0	0	0	0	1	0	0	0	0	0														1										1		1			1
Sitting for more than one hour		0	1	0	0	0	0	0	1	0	0	1	0	1		1																		1		1
Sitting for more than half an hour		0	0	0	0	0	0	0	0	0	0	0	0					1				1				1												1
Sedentary → Occasionally occurs		1	0	1	1	1	1	0	0	1	1	0	1																	1
Squatting for two hours or more		0	0	0	0	0	0	0	0	0	0	0	0																														1
Squatting for more than one hour		0	0	0	0	0	0	0	0	0	0	0	0																									1
Squatting for more than half an hour		0	0	0	0	0	0	0	0	0	0	0	0					1																		1				1
Long squat → Occasionally occurs		1	1	1	1	1	0	1	1	1	1	1	1														1			1							1		1			1
Walking → Two hours or more		1	1	1	1	1	0	0	1	0	0	0	0																							1				1
Walking → more than one hour		0	0	0	0	0	1	0	0	1	1	1	1													1												1	1			1					1
Walking → more than half an hour		0	0	0	0	0	0	1	0	0	0	0	0	1		1		1				1															1
Walking → Occasionally		0	0	0	0	0	0	0	0	0	0	0	0																	1
Running → Two hours or more		0	0	0	0	0	0	0	0	0	0	0	0
Running → more than one hour		0	0	0	0	0	0	0	0	0	0	0	0
Running → more than half an hour		0	0	0	0	0	0	0	0	0	0	0	0
Running → Occasionally		1	1	1	1	1	1	1	1	1	1	1	1																	1						1
Going up and down stairs → two hours or more		1	1	1	1	1	1	0	0	0	1	0	0
Going up and down stairs → more than one hour		0	0	0	0	0	0	0	0	1	0	0	0
Go up and down stairs → more than half an hour		0	0	0	0	0	0	0	0	0	0	0	0							1	1					1	1									1
Going up and down stairs → Occasionally		0	0	0	0	0	0	1	1	0	0	1	1																	1							1		1	1
Weight-bearing → Two hours or more		0	0	0	0	1	0	0	0	0	1	0	0																							1		1
Weight-bearing → more than one hour		0	0	0	0	1	0	1	0	1	0	0	0									1																		1
Weight-bearing → more than half an hour		0	0	0	0	0	0	0	0	0	0	0	0
Weight bearing → Occasionally occurs		0	1	1	1	0	1	0	1	0	0	1	1				1									1	1			1							1
Cold and humid environment → two hours or more		1	1	1	1	1	1	0	0	0	1	0	0
Cold and humid environment → more than one hour		0	0	0	0	0	0	0	0	1	0	0	0
Cold and humid environment → more than half an hour		0	0	0	0	0	0	0	0	0	0	0	0							1	1					1	1									1
Cold and humid environment → Occasionally occurs		0	0	0	0	0	0	1	1	0	0	1	1																	1							1
Smoking → Regular	Smoking and drinking status DI_SD	0	0	0	0	0	0	0	0	0	0	0	0								1																1		1										1
Smoking → Occasionally		0	0	0	0	0	0	0	0	0	0	0	0																							1								1
Smoking → No		1	1	1	1	1	1	1	1	1	1	1	1	1		1	1	1	1	1		1	1	1	1	1		1		1	1	1	1	1				1		1	1	1	1		1	1	1	1
Drinking → Regularly		0	0	0	0	0	0	0	0	0	0	0	0																															1
Drinking → Occasionally		0	0	0	0	0	0	0	0	0	0	1	0	1		1	1					1									1			1			1		1		1								1
Drinking → None		1	1	1	1	1	1	1	1	1	1	0	1					1	1	1			1	1	1	1		1		1		1	1			1		1		1		1	1		1	1	1	1
1. High-load confrontational sports such as basketball, football, and badminton	What sports do you mainly participate in (multiple choices are allowed) DI_Act	0	0	0	0	0	0	0	0	0	0	0	0																								1		1		1			1
2. Moderate-load exercise such as running, fitness, and square dancing		0	1	0	0	0	0	0	0	0	1	0	0								1									1	1	1													1
3. Low-load exercise such as walking, Tai Chi, swimming, etc.		0	0	0	0	0	1	0	1	0	0	0	0			1		1	1	1			1		1	1		1						1		1
4. Rarely participate in sports		1	0	1	1	1	0	1	0	1	0	1	1	1													1															1	1			1	1
1. Walking normally	Walk about two meters and observe the gait (multiple choices are allowed) KS_Gai	1	0	0	0	0	1	1	1	0	1	1	0				1	1	1	1		1	1		1			1		1	1	1		1		1				1	1
2. Walking slower		0	1	0	0	0	0	0	0	0	0	0	0	1							1						1						1					1	1			1
3. Slow start and stop		0	0	0	0	0	0	0	0	0	0	0	0
4. Intermittent claudication		0	0	0	1	0	0	0	0	1	0	0	1																								1
5. Frequent lameness		0	0	0	0	1	0	0	0	0	0	0	0											1		1													1
6. Swinging gait		0	0	0	0	0	0	0	0	0	0	0	0
7. Walking with your feet turned inside out		0	0	0	0	0	0	0	0	0	0	0	0			1								1
8. Walking with your feet turned outward		0	0	0	0	0	0	0	0	0	0	0	0
9. Others		0	0	1	0	0	0	0	0	0	0	0	0																																				1
Other cases
1. Stand normally, with the inner sides of both knees and inner ankles close together	Stand flat on the ground for ten seconds, keep the ankle and knee joints as close together as possible, and observe the axis and state of the knee joint. (Multiple choices are allowed) KS_Sta	1	1	1	0	1	1	1	1	1	1	1	1			1		1	1	1	1	1	1		1	1	1	1		1	1	1	1	1		1		1		1	1	1
2. Knee valgus (X-shaped legs), the inner sides of the knees can be close together and the inner ankles are separated		0	0	0	0	0	0	0	0	0	0	0	0
3. Knee varum (O-shaped legs), the inner ankles can be close together and the inner knees can be separated		0	0	0	0	0	0	0	0	0	0	0	0				1							1															1
4. Flexion deformity, the knee joint cannot be fully straightened		0	0	0	0	0	0	0	0	0	0	0	0	1																							1
5. Hyperextension deformity, excessive knee extension angle		0	0	0	0	0	0	0	0	0	0	0	0
6. Unable to stand		0	0	1	0	0	0	0	0	0	0	0	0	1
7. Able to stand, but with shaking and adaptive adjustments		0	0	0	0	0	0	0	0	0	0	0	0																								1
8. Others		0	0	0	0	0	0	0	0	0	0	0	0
Other cases
Normal	(You need to ask in advance whether you can sit down and related movements) Set up a chair with armrests on the ground, sit down from a standing position and then stand up, and observe the knee joint's movement. IA_Sitdown	0	0	0	0	0	1	1	1	1	1	1	1			1	1	1	1	1	1	1	1		1	1		1		1	1	1	1	1		1	1	1						1		1	1
Difficulty and Slowness		0	0	0	0	1	0	0	0	0	0	0	0	1										1			1		1
Absolutely not		0	0	0	0	0	0	0	0	0	0	0	0
Mild pain		0	0	0	0	0	0	0	0	0	0	0	0	1																						1
Moderate pain		0	0	0	0	0	0	0	0	0	0	0	0
Severe pain		0	0	0	0	0	0	0	0	0	0	0	0
Normal	(You need to ask in advance whether you can sit down and do related movements) Set up a chair with armrests on the ground, sit down from a standing position and then stand up, and observe the knee joint's movement. IA_Situp	0	0	0	0	0	1	1	1	1	1	1	1			1	1	1	1		1	1	1		1	1		1		1	1	1	1	1		1	1	1						1		1	1
Difficulty and Slowness		0	0	0	0	1	0	0	0	0	0	0	0	1										1			1		1
Absolutely not		0	0	0	0	0	0	0	0	0	0	0	0
Mild pain		0	0	0	0	0	0	0	0	0	0	0	0																							1
Moderate pain		0	0	0	0	0	0	0	0	0	0	0	0	1
Severe pain		0	0	0	0	0	0	0	0	0	0	0	0
Normal	(You need to ask in advance whether you can squat and do related movements) Squat down from a standing position and then stand up on the ground, and observe the knee joint's movement. Squat IA_squatdown	0	0	0	0	0	1	0	1	0	0	1	1						1	1	1		1					1		1	1	1	1				1	1						1			1
Difficulty and Slowness		0	0	0	0	0	0	1	0	1	1	0	0			1	1	1				1		1	1	1			1					1		1										1
Absolutely not		0	0	0	0	1	0	0	0	0	0	0	0	1													1												1
Mild pain		0	0	0	0	0	0	0	0	0	0	0	0					1																1				1
Moderate pain		0	0	0	0	0	0	0	0	0	0	0	0			1																				1
Severe pain		0	0	0	0	0	0	0	0	0	0	0	0
Normal	(You need to ask in advance whether you can squat and do related movements) Squat down from a standing position and then stand up on the ground to observe the knee joint's movement. Squat up IA_squatup	0	0	0	0	0	1	0	1	0	0	1	1						1	1	1		1					1		1	1	1	1				1	1
Difficulty and Slowness		0	0	0	0	0	0	1	0	1	1	0	0			1	1	1				1		1	1	1								1										1		1	1
Absolutely not		0	0	0	0	1	0	0	0	0	0	0	0	1													1		1							1			1
Mild pain		0	0	0	0	0	0	0	0	0	0	0	0					1																1
Moderate pain		0	0	0	0	0	0	0	0	0	0	0	0			1																						1
Severe pain		0	0	0	0	0	0	0	0	0	0	0	0																							1
Normal	(You need to ask in advance whether you can bend your knees and lift your legs and related movements) Start from a standing position on the ground and lift your left and right legs as far forward as possible and lower them down, and observe how the knee joints complete the movement. IA_Leftlift	0	0	0	0	0	0	0	0	0	0	0	0			1	1	1	1	1	1	1	1		1		1	1		1	1	1	1	1		1	1	1						1		1	1
Difficulty and Slowness		0	0	0	0	0	0	0	0	0	0	0	0	1										1		1			1
Absolutely not		0	0	0	0	1	0	0	0	0	0	0	0
Mild pain		0	0	0	0	0	0	0	0	0	0	0	0
Moderate pain		0	0	0	0	0	0	0	0	0	0	0	0
Severe pain		0	0	0	0	0	0	0	0	0	0	0	0
Normal	(You need to ask in advance whether you can bend your knees and lift your legs and related movements) Start from a standing position on the ground and lift your left and right legs as far forward as possible and lower them down, and observe how the knee joint completes the movement. Right leg bends the knees and lifts your legs IA_Rightlift	0	0	0	0	0	0	0	0	0	0	0	0			1	1	1	1	1	1	1	1		1		1	1		1	1	1	1	1		1	1	1						1		1	1
Difficulty and Slowness		0	0	0	0	0	0	0	0	0	0	0	0	1										1		1			1
Absolutely not		0	0	0	0	1	0	0	0	0	0	0	0
Mild pain		0	0	0	0	0	0	0	0	0	0	0	0
Moderate pain		0	0	0	0	0	0	0	0	0	0	0	0
Severe pain		0	0	0	0	0	0	0	0	0	0	0	0
Normal	(You need to ask in advance whether you can go up and down stairs and related movements) Whether you can go up and down stairs, observe the knee joint to complete the movement. IA_Upstairs	0	0	0	0	0	1	1	1	1	1	1	1								1		1					1		1	1	1					1	1						1		1	1
Difficulty and Slowness		0	0	0	0	1	0	0	0	0	0	0	0	1		1	1	1	1	1		1		1	1		1		1				1	1		1			1
Absolutely not		0	0	0	0	0	0	0	0	0	0	0	0													1
Mild pain		0	0	0	0	0	1	0	1	0	1	1	1					1	1
Moderate pain		0	0	0	0	1	0	1	0	0	0	0	0			1				1						1
Severe pain		0	0	0	0	0	0	0	0	1	0	0	0	1																				1		1
Normal	(You need to ask in advance whether you can go up and down stairs and related movements) Whether you can go up and down stairs, observe the knee joint to complete the movement. IA_Downstairs	0	0	0	0	0	1	1	1	1	1	1	1								1		1					1		1	1	1					1	1									1
Difficulty and Slowness		0	0	0	0	1	0	0	0	0	0	0	0	1			1	1	1	1		1		1	1	1	1		1				1	1		1			1					1		1
Absolutely not		0	0	0	0	0	0	0	0	0	0	0	0			1
Mild pain		0	0	0	0	0	1	0	1	0	1	1	1																					1
Moderate pain		0	0	0	0	1	0	1	0	0	0	0	0					1	1	1						1										1
Severe pain		0	0	0	0	0	0	0	0	1	0	0	0	1
Fill in the extension angle	Knee range of motion measurement SE_ROM	0	0	0	0	0	0	0	0	0	0	0	0	0	0	0	0	0	0	0	0	0	0	0	0	0	0	0	0	0	0	0	0	0	0	0							0°	0°		0°	0°		0°
Fill in the flexion angle		0	0	0	0	0	0	0	0	0	0	0	0	0	0	0	0	0	0	0	0	0	0	0	0	0	0	0	0	0	0	0	0	0	0	0							fixed	120°	0° fixed	135°	135°		90°
1.Normal	Patella grinding test SE_PGT	0	0	0	0	0	0	0	0	0	0	0	0	0	0	0	0	0	0	0	0	0	0	0	0	0	0	0	0	0	0	0	0	0	0	0								1			1	1	1
2.If there is a rough friction feeling, it is positive. -- Damage and degeneration of the patellofemoral joint cartilage surface.		0	0	0	0	0	0	0	0	0	0	0	0	0	0	0	0	0	0	0	0	0	0	0	0	0	0	0	0	0	0	0	0	0	0	0
1.Normal	Fluid Floating Patella Test The examiner holds the suprapatellar bursa with open left hand and squeezes it distally moderately, and places the right fingers above the patella and squeezes downward. SE_Ball	0	0	0	0	0	0	0	0	0	0	0	0	0	0	0	0	0	0	0	0	0	0	0	0	0	0	0	0	0	0	0	0	0	0	0								1	1	1	1	1
2.Feel the patella hitting the femur below and a sense of upward resistance.		0	0	0	0	0	0	0	0	0	0	0	0	0	0	0	0	0	0	0	0	0	0	0	0	0	0	0	0	0	0	0	0	0	0	0							1						1
1.Normal	Meniscus grinding test SE_MGT	0	0	0	0	0	0	0	0	0	1	0	0	0	0	0	0	0	0	0	0	0	0	0	0	0	0	1	0	0	0	0	0	0	0	0											1	1	1
2.Positive if pain occurs during internal or external rotation		0	0	1	0	1	0	1	1	1	0	0	1	0	0	0	1	0	0	0	1	0	0	1	0	0	1	0	0	0	1	1	1	1	0	1		1	1		1	1				1
1.Normal	Front drawer test SE_ADT	0	0	0	0	0	0	0	0	0	0	0	0	0	0	0	0	0	0	0	0	0	0	0	0	0	0	0	0	0	0	0	0	0	0	0								1		1	1
2.Tibial anterior translation exceeds 5mm		1	0	1	0	0	0	0	0	0	0	0	0	0	0	0	0	0	0	0	0	0	0	0	0	0	0	0	0	0	0	0	0	0	0	0	1	1										1	(See the questionnaire for details)
1.Normal	Rear drawer test SE_PDT	0	0	0	0	0	0	0	0	0	0	0	0	0	0	0	0	0	0	0	0	0	0	0	0	0	0	0	0	0	0	0	0	0	0	0										1	1	1
2.Tibial posterior translation exceeds 5mm		0	0	0	0	0	0	0	0	0	0	0	0	0	0	0	0	0	0	0	0	0	0	0	0	0	0	0	0	0	0	0	0	0	0	0			1					1
1.Normal	Eversion stress test SE_EST	0	0	0	0	0	0	0	0	0	0	0	0	0	0	0	0	0	0	0	0	0	0	0	0	0	0	0	0	0	0	0	0	0	0	0							1	1	1	1	1		1
2.Only the 30° position was positive.		0	0	0	0	0	0	0	0	0	0	0	0	0	0	0	0	0	0	0	0	0	0	0	0	0	0	0	0	0	0	0	0	0	0	0
3.For example, both the 0° and 30° positions are positive.		0	0	0	0	0	0	0	0	0	0	0	0	0	0	0	0	0	0	0	0	0	0	0	0	0	0	0	0	0	0	0	0	0	0	0												1
1.Normal	Varus stress test SE_VST	0	0	0	0	0	0	0	0	0	0	0	0	0	0	0	0	0	0	0	0	0	0	0	0	0	0	0	0	0	0	0	0	0	0	0							1	1	1	1	1	1	1
2.Only the 30° position was positive.		0	0	0	0	0	0	0	0	0	0	0	0	0	0	0	0	0	0	0	0	0	0	0	0	0	0	0	0	0	0	0	0	0	0	0
3.For example, both the 0° and 30° positions are positive.		0	0	0	0	0	0	0	0	0	0	0	0	0	0	0	0	0	0	0	0	0	0	0	0	0	0	0	0	0	0	0	0	0	0	0
Remark				Inability to walk			Swelling to be determined	The right leg is thinner		There is a question about the upper edge of the patella															Lump in front of knee
		1	2	3	4	5	6	7	8	9	10	11	12	13	14	15	16	17	18	19	20	21	22	23	24	25	26	27	28	29	30	31	32	33	34	35	36	37	38	39	40	41	42	43	44	45	46	47	48
[truncated: 99 more columns]

## Sheet: Calculate the error and set it 
KOA	MeniscusTear	GeneralFreeBody	PatellarPain	PatellarInstab	ACL	PCL	MCL	LCL	Sex	Age	BMI	FlexionLimit(yes1，no0)	ExtensionLimit(yes1，no0)	Snapping(yes1，no0)	Locking(yes1，no0)	Instability(yes1，no0)	KneeDislocation(yes1，no0)	PatellarDislocation(yes1，no0)	Stiffness(yes1，no0)	Injure(yes1，no0)	InjurZip(yes1，no0)	Swelling(yes1，no0)	Pain(yes1，no0)	PainActivity	PainNight	PainHyperflexion	TendWandering	TendKneeSpace	TendSurfacePatella	TendBlowPatella
0	0	0	0	1	0	0	0	0	1	14	26.079	0	0	1	0	0	0	1	0	1	0	0	1	0	0	0	0	1	0	0
0	0	0	0	1	0	0	0	0	0	15	0	1	1	0	0	0	0	1	0	1	0	1	1	0	0	1	0	1	0	0
0	0	0	0	1	0	0	0	0	0	19	22.1526	1	1	1	0	0	0	1	0	1	0	1	1	0	0	1	0	0	0	0
0	0	0	0	1	0	0	0	0	0	16	25.7276	1	1	0	0	0	0	1	0	1	0	1	1	0	0	0	0	0	0	0
0	0	0	0	1	0	0	0	0	1	27	21.4844	1	1	0	0	0	0	1	0	1	0	1	1	0	0	1	0	0	0	0
0	1	0	0	1	0	0	0	0	0	17	26.2227	0	0	0	0	0	0	1	0	1	0	0	1	1	0	1	0	1	0	0
0	0	0	0	0	0	0	0	0	0	59	20.3125	1	1	0	0	0	0	0	0	1	1	0	1	0	0	1	0	0	0	0
0	0	0	0	0	0	0	0	0	1	75	23.8728	1	0	1	1	1	0	0	0	0	0	1	1	0	0	1	0	0	0	0
0	0	0	1	0	0	0	0	0	1	57	0	0	0	1	0	1	0	0	0	0	0	0	1	1	0	0	0	0	0	0
0	0	0	0	0	0	0	0	0	1	48	21.83	0	0	0	0	1	0	0	0	0	0	0	1	0	0	0	0	0	0	0
0	0	0	0	0	0	0	0	0	1	58	29.2969	0	0	0	0	0	0	0	1	0	0	0	1	0	0	0	0	0	0	0
0	0	0	0	0	0	0	0	0	0	71	20.6612	0	0	0	0	0	0	0	0	0	0	0	1	1	0	0	0	0	0	0
0	0	1	0	0	0	0	0	0	1	18	25.5937	0	0	1	1	0	0	0	0	1	0	0	1	1	0	0	1	1	0	0
0	0	1	0	0	0	0	0	0	0	63	27.6817	1	1	1	1	1	0	0	1	1	0	0	1	0	0	1	1	1	0	0
0	0	0	0	0	0	0	0	0	1	68	28.4444	0	0	0	0	1	0	0	1	0	0	0	1	1	0	1	0	0	0	0
1	0	1	0	0	0	0	0	0	1	49	22.0386	1	0	1	1	1	0	0	1	1	0	0	1	0	0	1	1	1	0	0
1	0	1	0	0	0	0	0	0	1	49	22.0386	1	0	1	1	1	0	0	1	1	0	0	1	0	0	1	1	1	0	0
1	0	1	0	0	0	0	0	0	1	53	21.0937	0	0	1	1	0	0	0	0	0	0	0	1	1	0	0	1	1	0	0
1	0	0	0	0	0	0	0	0	0	67	29.2969	1	0	1	0	0	0	0	0	0	0	0	1	1	0	1	0	0	0	0
1	0	0	1	0	0	0	0	0	1	66	24.0346	0	0	1	1	0	0	0	0	0	0	0	1	1	0	0	0	0	1	0
1	0	0	1	0	0	0	0	0	1	33	24.2439	1	0	0	1	0	1	0	1	1	0	0	0	0	0	0	0	0	0	0
1	0	0	1	0	0	0	0	0	1	71	26.6667	0	0	1	1	1	1	0	1	0	0	0	0	0	0	0	0	0	0	0
1	0	0	1	0	0	0	0	0	1	57	20.5693	0	0	1	0	0	0	0	1	0	0	0	1	0	0	1	0	0	1	0
1	0	0	0	0	0	0	0	0	1	56	20.3244	0	0	1	0	0	0	0	0	0	0	0	1	1	0	0	0	1	0	0
1	0	0	0	0	0	0	0	0	1	55	23.833	0	0	1	0	0	0	0	0	0	0	0	1	1	0	0	0	1	0	0
1	0	0	0	0	0	0	0	0	1	62	22.1893	0	0	1	0	0	0	0	0	0	0	0	1	1	0	0	0	1	1	0
1	0	0	0	0	0	0	0	0	1	53	23.0518	0	0	1	0	0	0	0	1	0	0	0	1	0	0	0	0	1	0	0
1	0	0	0	0	0	0	0	0	1	56	22.4766	0	0	1	0	0	0	0	0	0	0	0	1	1	0	0	0	1	0	0
1	0	0	0	0	0	0	0	0	1	62	24.7768	0	0	1	1	0	0	0	1	0	0	0	1	0	0	1	0	1	0	1
1	0	0	0	0	0	0	0	0	0	24	23.5102	1	0	0	0	0	0	0	0	1	0	0	1	1	0	1	0	0	0	0
1	1	0	0	0	0	0	0	0	1	65	24.7676	1	1	1	0	1	0	0	0	0	0	0	1	1	0	1	0	1	0	0
1	0	0	0	0	0	0	0	0	1	55	19.5196	1	0	1	0	1	0	0	0	0	0	1	1	1	0	1	0	1	0	0
1	1	0	0	0	0	0	0	0	1	65	30.0914	1	0	1	1	1	0	0	0	0	1	0	1	1	0	1	0	1	0	0
1	1	0	1	1	0	0	0	0	1	61	28.0404	0	0	1	1	0	0	0	0	1	0	1	1	1	0	1	0	1	0	0
1	1	0	1	0	0	0	0	0	1	35	ActiveX VT_ERROR:	1	1	0	1	1	0	0	0	1	0	0	1	1	0	1	0	1	0	0
1	1	0	0	0	0	0	0	0	0	47	20.5191	0	0	0	0	0	0	0	0	1	0	0	1	1	0	1	0	1	1	0
1	1	1	0	0	0	0	0	0	1	60	27.5482	1	0	1	1	0	0	0	0	1	1	0	1	0	0	1	1	1	0	0
1	1	0	0	0	0	0	0	0	0	65	22.7732	0	0	1	0	1	0	0	1	0	0	0	1	1	0	0	0	1	1	0
1	1	0	0	0	0	0	0	0	1	56	24.2187	1	1	1	0	0	0	0	1	0	0	1	1	0	0	0	0	1	0	0
1	1	0	0	0	0	0	0	0	1	64	26.1719	0	0	0	0	0	0	0	1	0	0	0	1	0	0	1	0	1	0	0
1	1	0	0	0	0	0	0	0	1	56	22.2656	0	0	1	0	0	0	0	0	0	0	1	1	0	0	1	0	1	1	0
1	1	0	0	0	0	0	0	0	1	61	27.5482	0	0	1	0	0	0	0	0	0	0	0	1	0	0	1	0	1	0	0
1	1	0	0	0	0	0	0	0	1	56	0	0	0	1	0	1	0	0	0	0	0	0	1	1	0	1	0	1	0	0
1	1	0	0	0	0	0	0	0	1	54	23.3067	0	0	1	0	0	0	0	0	0	0	0	1	1	0	1	0	1	0	0
1	1	0	0	0	0	0	0	0	0	53	21.83	1	0	1	0	0	0	0	0	0	0	0	1	1	0	1	0	1	0	0
1	1	0	0	0	0	0	0	0	0	65	28.4055	0	0	1	0	0	0	0	1	0	0	1	1	1	0	1	0	1	0	0
1	1	0	0	0	0	0	0	0	1	55	27.0552	1	0	0	0	0	0	0	1	0	0	0	1	1	0	1	0	1	0	0
1	1	0	0	0	0	0	0	0	1	46	24.7676	1	0	0	0	1	0	0	1	1	0	0	1	0	0	0	0	1	0	0
0	1	0	0	0	0	0	0	0	1	66	23.4375	1	0	0	0	0	0	0	1	1	0	0	1	0	0	0	0	1	0	0
1	1	0	0	0	0	0	0	0	1	57	23.2434	0	0	1	1	0	0	0	1	1	0	0	1	0	0	1	0	1	0	0
1	1	0	0	0	0	0	0	0	1	48	28.2828	0	0	1	0	0	0	0	0	1	0	0	1	0	0	0	0	1	0	0
1	1	0	0	0	0	0	0	0	1	45	19.721	1	0	1	0	0	0	0	0	1	0	0	1	1	0	1	0	1	0	0
1	1	0	0	0	0	0	0	0	1	65	33.2031	1	1	0	1	1	0	0	1	0	0	1	1	1	0	1	0	1	0	0
1	1	0	0	0	0	0	0	0	1	54	0	0	0	1	1	1	0	0	0	0	0	0	1	1	0	1	0	0	0	0
1	1	0	0	0	0	0	0	0	1	45	25.3155	1	0	1	0	1	0	0	0	0	0	0	1	1	0	1	0	1	0	0
1	1	0	0	0	0	0	0	0	1	55	23.4375	1	0	1	1	1	0	0	0	0	1	0	1	1	0	1	0	1	0	0
1	1	0	0	0	0	0	0	0	1	45	20.8984	1	0	1	0	1	0	0	0	1	0	1	1	1	0	1	0	1	0	0
1	1	0	0	0	0	0	0	0	0	45	20.1951	1	0	1	0	0	0	0	0	0	0	1	1	1	0	1	0	1	0	0
1	1	0	0	0	0	0	0	0	0	45	17.239	0	0	0	0	0	0	0	0	1	0	0	1	1	0	0	0	1	0	0
0	1	0	0	0	0	0	0	0	0	51	23.1481	1	0	1	0	0	0	0	0	0	0	1	1	0	0	1	0	1	0	0
0	1	0	0	0	0	0	0	0	1	65	25.7778	0	0	0	0	0	0	0	0	0	0	1	1	1	0	0	0	1	0	0
0	1	0	0	0	0	0	0	0	0	63	21.2031	0	0	1	0	1	0	0	0	1	0	0	1	1	0	0	0	1	0	0
0	1	0	0	0	0	0	0	0	0	44	24.0569	0	0	1	0	0	0	0	1	0	0	0	1	1	0	0	0	1	0	0
0	1	0	0	0	0	0	0	0	1	42	23.7387	0	0	1	1	0	0	0	1	1	0	1	1	1	0	0	0	1	0	0
0	1	0	0	0	0	0	0	0	0	33	23.03	1	0	0	0	1	0	0	0	1	0	0	1	1	0	1	0	1	0	0
0	1	0	0	0	0	0	0	0	0	20	20.7451	1	1	1	0	0	0	0	0	1	0	1	1	1	0	1	0	1	0	0
0	1	0	0	0	0	0	0	0	1	57	27.3437	0	0	1	0	0	0	0	0	0	0	0	1	0	0	1	0	1	0	0
0	1	0	0	0	0	0	0	0	0	46	23.8087	0	0	0	0	0	0	0	0	0	0	0	1	0	0	1	0	1	0	0
0	1	0	0	0	0	0	0	0	0	16	18.8121	1	0	1	1	0	0	0	0	1	0	0	1	1	0	1	0	1	0	0
0	1	0	0	0	0	0	0	0	0	49	22.1453	1	0	1	1	0	0	0	0	0	0	0	1	1	0	0	0	1	0	0
0	1	0	0	0	0	0	0	0	0	37	ActiveX VT_ERROR:	0	1	0	0	0	0	0	0	1	1	0	1	0	0	0	0	1	0	0
0	1	0	0	0	0	0	0	0	1	22	0	1	0	1	0	0	0	0	0	0	0	0	1	1	0	0	0	1	0	0
0	1	0	0	0	0	0	0	0	0	51	23.0469	0	1	1	0	1	0	0	0	1	0	1	1	0	0	1	0	1	0	0
0	1	0	0	0	0	0	0	0	0	29	26.8274	0	0	0	0	0	0	0	0	0	0	0	1	1	0	1	0	1	0	0
0	1	0	0	0	0	0	0	0	0	39	30.9617	1	0	1	0	0	0	0	0	0	0	0	1	1	0	0	0	1	0	0
0	1	0	0	0	0	0	0	0	0	50	19.4362	0	0	1	0	0	0	0	0	0	0	0	1	1	0	1	0	1	0	0
0	1	0	0	0	0	0	0	0	1	40	31.8878	1	1	1	0	0	0	0	0	1	0	0	1	0	0	1	0	1	0	0
0	1	0	0	0	0	0	0	0	0	29	20.0692	0	0	1	0	0	0	0	0	1	0	0	1	1	0	0	0	1	0	0
0	1	0	0	0	0	0	0	0	1	53	27.3437	0	0	1	0	1	0	0	0	1	0	0	1	1	0	1	0	1	0	0
0	1	0	0	0	0	0	0	0	0	49	28.3447	0	0	1	1	0	0	0	0	1	0	0	1	1	0	1	0	1	0	0
0	1	0	0	0	0	0	0	0	0	22	21.4533	1	1	0	1	0	0	0	0	1	1	0	1	1	0	1	0	1	0	0
0	1	0	0	0	0	0	0	0	0	47	49.5351	1	1	1	1	0	0	0	1	1	1	1	1	1	0	1	0	1	0	0
0	1	0	0	0	0	0	0	0	0	47	49.5351	1	1	1	1	0	0	0	0	1	1	1	1	1	0	1	0	1	0	0
0	1	0	0	0	0	0	0	0	0	54	29.3848	1	0	1	0	1	0	0	0	0	0	1	1	1	0	1	0	1	0	0
0	1	0	0	0	0	0	0	0	0	37	23.7654	0	0	0	0	1	0	0	0	1	1	0	1	1	0	1	0	1	0	0
0	1	0	0	0	0	0	0	0	0	55	19.8347	1	0	1	0	1	0	0	0	0	0	1	1	1	0	1	0	1	0	0
0	1	0	0	0	0	0	0	0	0	55	20.0796	1	0	1	0	1	0	0	0	1	0	1	1	1	0	1	0	1	0	0
0	1	0	0	0	0	0	0	0	0	28	0.552354	0	0	1	0	0	0	0	0	1	0	0	1	1	0	1	0	1	0	0
0	1	0	0	0	0	0	0	0	0	48	25.6489	0	0	1	0	0	0	0	0	1	0	0	1	0	0	1	0	1	0	0
0	1	0	0	0	0	0	0	0	0	28	23.03	1	0	1	0	0	0	0	0	1	0	0	1	0	0	1	0	1	0	0
0	1	0	0	0	0	0	0	0	0	32	30.1038	0	0	0	0	0	0	0	0	1	0	1	1	1	0	0	0	1	0	0
0	1	0	0	0	0	0	0	0	1	53	20.3125	0	0	0	0	0	0	0	0	1	0	0	1	1	0	1	0	1	0	0
0	1	1	0	0	0	0	0	0	0	10	15.6956	1	1	0	1	0	0	0	0	0	0	1	1	0	0	1	1	1	0	0
0	1	1	0	0	0	0	0	0	0	26	27.1314	1	0	1	0	1	0	0	1	1	0	0	1	1	0	1	1	1	0	0
0	1	1	0	1	0	0	0	0	1	15	ActiveX VT_ERROR:	1	1	0	0	0	0	1	0	1	1	1	1	0	0	0	1	1	0	0
0	1	0	1	0	0	0	0	0	1	55	26.5338	0	0	1	0	0	0	0	1	0	0	1	1	0	0	1	0	1	1	0
0	1	0	1	0	0	0	0	0	0	75	24.4418	0	0	1	0	0	0	0	0	0	0	0	1	1	0	1	0	1	1	0
0	1	0	1	0	0	0	0	0	0	67	30.303	1	0	0	1	1	0	0	0	1	0	1	1	0	0	1	0	1	1	0
0	0	0	1	0	0	0	0	0	1	44	23.3067	0	0	1	1	0	0	0	1	1	1	0	1	1	0	0	0	0	1	0
0	0	0	1	0	0	0	0	0	1	53	18.8189	0	0	0	0	1	0	0	0	0	0	0	1	0	0	1	0	0	1	0
0	0	0	1	0	0	0	0	0	1	61	19.2894	0	0	1	0	0	0	0	0	0	0	0	1	1	0	1	0	0	1	0
0	0	0	1	0	0	0	0	0	1	57	20.7008	0	0	1	0	0	0	0	0	0	0	0	1	1	0	1	0	0	1	0
0	1	0	0	0	1	0	0	0	1	49	23.8281	0	0	1	0	1	1	0	0	1	1	0	1	1	0	1	0	1	0	0
0	1	0	0	0	1	0	0	0	0	25	24.0346	1	0	1	1	1	1	0	0	1	1	1	1	1	0	1	0	1	0	0
0	1	0	0	0	1	0	0	0	0	40	26.1224	1	0	0	0	1	0	0	0	1	1	1	1	1	0	1	0	1	0	0
0	1	0	0	0	1	0	0	0	0	55	25.4028	1	1	0	0	1	0	0	0	1	1	0	1	1	0	0	0	1	0	0
0	1	0	0	0	1	0	0	0	1	32	24.2187	0	0	1	1	1	0	0	1	1	1	0	1	1	0	0	0	1	0	0
0	1	0	0	0	1	0	0	0	0	29	26.493	0	0	1	0	1	0	0	0	1	0	1	1	1	0	1	0	1	0	0
0	1	0	0	0	1	0	0	0	0	31	24.9307	1	0	0	0	1	1	0	0	1	1	1	1	1	0	1	0	1	0	0
0	1	0	0	0	1	0	0	0	0	23	23.3887	1	0	0	0	1	1	0	0	1	0	1	1	0	0	1	0	1	0	0
0	1	0	0	0	1	0	0	0	1	30	22.719	1	1	0	1	1	1	0	0	1	0	1	1	1	0	1	0	1	0	0
0	1	0	0	0	1	0	0	0	0	39	27.5482	1	0	0	0	0	0	0	0	1	1	0	1	0	0	1	0	1	0	0
0	1	0	0	0	1	0	0	0	0	10	28.4028	0	1	0	0	0	0	0	0	1	1	0	1	1	0	0	0	1	0	0
0	1	0	0	0	1	0	0	0	1	26	18.6851	0	0	1	1	0	1	0	0	1	0	0	1	1	0	0	0	1	0	0
0	1	0	0	0	1	0	0	0	0	22	21.4533	1	1	0	0	0	0	0	0	1	1	0	1	1	0	1	0	1	0	0
0	1	0	0	0	1	0	0	0	1	46	27.0552	0	0	0	0	1	1	0	0	1	0	0	1	0	0	1	0	1	0	0
0	0	0	0	0	1	0	0	0	0	23	27.4717	1	1	0	0	1	1	0	0	0	0	1	1	1	0	1	0	0	0	0
0	0	0	1	0	1	0	0	0	1	53	26.079	1	0	0	0	1	1	0	0	1	0	1	1	0	0	0	0	1	0	0
1	0	0	0	0	1	0	0	0	1	46	24.4444	0	0	0	0	1	0	0	0	1	0	1	1	0	0	1	0	0	0	0
1	0	0	0	0	1	0	0	0	0	40	31.1419	1	1	0	0	1	1	0	1	1	0	1	1	0	0	1	0	1	0	0
1	0	0	0	0	1	0	0	0	1	32	21.9671	0	0	0	0	1	0	0	0	1	0	1	0	0	0	1	0	0	0	0
1	0	0	0	0	1	0	0	0	1	36	22.6562	1	1	1	1	1	1	0	0	1	1	1	1	1	0	0	0	1	0	0
1	0	0	0	0	1	0	0	0	0	26	24.2215	0	0	0	1	1	1	0	0	1	1	0	1	1	0	0	0	1	0	0
0	0	0	1	0	1	0	0	0	0	30	24.9135	0	0	1	0	1	0	0	0	1	1	0	0	0	0	0	0	0	0	0
0	0	0	0	0	1	0	0	0	0	40	28.2284	0	0	0	0	1	1	0	0	1	1	0	0	0	0	0	0	0	0	0
0	0	0	0	0	1	0	0	0	0	20	25.7117	1	1	0	1	1	0	0	0	1	1	1	1	1	0	1	0	1	0	0
0	0	0	0	0	1	0	0	0	1	42	24.974	1	1	0	0	1	1	0	0	1	0	1	1	0	0	1	0	1	0	0
0	0	0	0	0	1	0	0	0	0	47	20.0617	1	0	0	0	1	1	0	0	1	1	0	1	1	0	1	0	1	0	0
0	0	0	0	0	1	0	0	0	0	32	24.1633	0	0	0	0	1	1	0	0	1	1	0	0	0	0	0	0	0	0	0
0	0	0	0	0	1	0	0	0	1	22	19.2672	1	0	0	0	0	1	0	0	1	1	0	1	0	0	0	0	0	0	0
0	0	0	0	0	1	0	0	0	1	33	24.2439	1	0	1	1	0	1	0	1	1	1	0	1	0	0	0	0	1	0	0
0	0	0	0	0	1	1	0	0	0	30	26.2346	0	0	0	0	1	1	0	0	1	1	1	1	1	0	1	0	1	0	0
0	0	0	0	0	1	1	0	0	0	20	25.9516	1	1	0	0	1	1	0	0	1	0	1	1	1	0	0	0	0	0	0
0	0	0	0	0	1	1	0	0	0	50	22.3214	1	0	0	0	1	1	0	0	1	0	1	1	0	0	1	0	1	0	0
0	0	0	0	0	1	1	0	0	0	29	25.2493	0	0	1	0	1	1	0	0	1	1	1	1	0	0	1	0	1	0	0
0	1	0	0	0	1	1	0	0	1	46	21.6311	1	1	0	0	1	0	0	0	1	1	0	1	1	0	1	0	1	0	0
0	0	0	0	0	1	1	1	0	0	35	26.5731	0	0	0	0	1	0	0	0	1	0	1	1	1	0	1	0	1	0	0
0	0	0	0	0	0	1	0	0	0	13	30.3673	0	0	0	0	1	0	0	0	1	0	1	1	1	0	0	0	0	0	0
0	0	0	0	0	0	1	0	0	0	50	29.4118	1	0	0	0	1	1	0	0	1	0	1	1	0	0	1	0	1	0	0
0	0	0	0	0	0	1	0	0	0	20	20.2812	1	1	0	0	1	1	0	0	1	0	1	1	0	0	1	0	1	0	0
0	0	0	0	0	0	1	1	0	0	48	22.0386	1	1	0	0	1	1	0	0	1	0	1	1	0	0	1	0	0	0	0
0	1	0	0	0	0	1	0	0	0	28	25.1024	1	0	1	1	0	1	0	0	1	0	1	1	0	0	1	0	1	0	0
0	1	0	1	0	0	1	0	0	0	46	28.4055	1	0	0	0	0	1	0	0	1	0	1	1	1	0	1	0	1	0	0
0	0	0	0	0	0	1	0	0	0	43	23.9158	1	1	0	0	0	1	0	0	1	0	1	1	1	0	1	0	0	0	0
0	0	0	0	0	0	1	0	0	1	49	24.2215	1	0	0	0	0	1	0	0	1	0	1	1	0	0	1	0	1	0	0
0	0	0	0	0	0	1	0	0	1	51	27.268	1	0	0	0	0	1	0	0	1	0	0	1	1	0	1	0	1	0	0
	0	0	0	0	0	1	1	0	0	51	23.7954	1	1	0	0	1	0	0	0	1	0	0	1	1	0	1	0	0	0	0
0	0	0	0	0	1	0	0	0	1	33	16.7657	1	1	1	0	1	1	0	1	1	0	1	1	0	1	0	0	0	0	0
0	0	0	0	0	1	0	0	0	0	31	27.8867	0	1	1	1	1	0	1	0	1	0	1	0	0	0	0	0	0	0	0
0	0	0	0	0	1	0	0	0	0	30	24.7843	0	1	0	0	1	1	0	1	1	0	0	1	1	0	0	0	0	0	0
0	0	0	0	0	1	0	0	0	0	20	23.246	1	1	0	0	1	0	0	1	1	0	0	0	0	0	0	0	0	0	0
0	1	0	0	0	1	0	0	0	0	30	18.9292	1	0	1	0	1	1	0	0	1	0	1	1	1	1	1	0	0	0	0
0	1	0	0	0	1	0	0	0	0	24	20.0155	0	0	0	0	1	0	0	0	1	0	0	1	1	0	0	0	1	0	0
0	0	0	0	0	1	0	0	0	1	52	31.8359	0	0	1	0	1	1	0	0	1	0	1	1	1	0	0	0	1	0	0
0	0	0	0	0	1	0	0	0	0	23	21.9713	1	0	1	1	1	0	0	0	1	1	1	0	0	1	0	0	1	0	0
0	0	0	0	1	0	0	0	0	1	29	25.9695	0	0	1	0	0	0	1	0	1	0	0	1	0	0	0	0	0	1	0
0	0	0	0	1	0	0	0	0	1	19	19.9594	0	1	1	0	1	0	1	0	1	0	0	1	1	0	0	0	0	0	0
48	27	4	6	1	5	0	0	0	38	0	0	22	6	35	17	20	5	0	16	19	5	12	45	30	0	32	4	39	6	1
1	0.5625	0.0833333	0.125	0.0208333	0.104167	0	0	0	0.791667	0	0	0.458333	0.125	0.729167	0.354167	0.416667	0.104167	0	0.333333	0.395833	0.104167	0.25	0.9375	0.625	0	0.666667	0.0833333	0.8125	0.125	0.0208333
27	87	4	6	3	17	3	0	0	37	0	0	46	18	54	22	34	10	2	15	55	19	31	87	62	1	65	4	85	6	0
0.310345	1	0.045977	0.0689655	0.0344828	0.195402	0.0344828	0	0	0.425287	0	0	0.528736	0.206897	0.62069	0.252874	0.390805	0.114943	0.0229885	0.172414	0.632184	0.218391	0.356322	1	0.712644	0.0114943	0.747126	0.045977	0.977011	0.0689655	0
4	4	9	0	1	0	0	0	0	6	0	0	7	3	7	7	4	0	1	4	7	2	2	9	3	0	6	9	9	0	0
0.444444	0.444444	1	0	0.111111	0	0	0	0	0.666667	0	0	0.777778	0.333333	0.777778	0.777778	0.444444	0	0.111111	0.444444	0.777778	0.222222	0.222222	1	0.333333	0	0.666667	1	1	0	0
6	6	0	17	1	2	1	0	0	13	0	0	5	1	11	7	7	4	0	5	8	2	5	14	9	0	10	0	7	9	0
0.352941	0.352941	0	1	0.0588235	0.117647	0.0588235	0	0	0.764706	0	0	0.294118	0.0588235	0.647059	0.411765	0.411765	0.235294	0	0.294118	0.470588	0.117647	0.294118	0.823529	0.529412	0	0.588235	0	0.411765	0.529412	0
1	3	1	1	10	0	0	0	0	6	0	0	5	6	5	1	1	0	9	0	10	1	6	10	3	0	5	1	5	1	0
0.1	0.3	0.1	0.1	1	0	0	0	0	0.6	0	0	0.5	0.6	0.5	0.1	0.1	0	0.9	0	1	0.1	0.6	1	0.3	0	0.5	0.1	0.5	0.1	0
5	17	0	2	0	43	6	1	0	15	0	0	24	15	14	10	37	26	1	6	42	22	24	36	24	3	23	0	30	0	0
0.116279	0.395349	0	0.0465116	0	1	0.139535	0.0232558	0	0.348837	0	0	0.55814	0.348837	0.325581	0.232558	0.860465	0.604651	0.0232558	0.139535	0.976744	0.511628	0.55814	0.837209	0.55814	0.0697674	0.534884	0	0.697674	0	0
0	3	0	1	0	6	16	3	0	3	0	0	12	6	2	1	11	12	0	0	16	3	13	16	9	0	14	0	11	0	0
0	0.1875	0	0.0625	0	0.375	1	0.1875	0	0.1875	0	0	0.75	0.375	0.125	0.0625	0.6875	0.75	0	0	1	0.1875	0.8125	1	0.5625	0	0.875	0	0.6875	0	0
0	0	0	0	0	1	3	3	0	0	0	0	2	2	0	0	3	1	0	0	3	0	2	3	2	0	3	0	1	0	0
0	0	0	0	0	0.333333	1	1	0	0	0	0	0.666667	0.666667	0	0	1	0.333333	0	0	1	0	0.666667	1	0.666667	0	1	0	0.333333	0	0

## Sheet: Calculation Summary
Specific options	serial number	Knee osteoarthritis	Meniscus injury	General free bodies	Patellofemoral arthritis/patellar syndrome/patellofemoral arthropathy/synovial plica syndrome PFD	Patellar instability/patellar dislocation	ACL tear/injury ACL	Posterior cruciate ligament tear/injury PCL	Medial collateral ligament tear/injury MCL	Lateral collateral ligament tear/injury LCL	Name	Gender (Male 0, Female 1)	Age	BMI	Affected knee odd or even (even 0, odd 1)	1. Mild flexion difficulty	2. Severe flexion difficulties	Limited flexion (1 for yes, 0 for no)	1. Mild difficulty in straightening	2. Severe difficulty in straightening	Limited extension (1 if yes, 0 if no)	1. There is a slight clicking sound, which happens occasionally	2. There is a snapping sound, moderate, and occurs frequently	3. There is a snapping sound, which is severe and occurs every time you do something.	Bounce (1 if yes, 0 if no)	1. Interlocking, slight	2. There is interlocking, serious	Interlock (1, no 0)	1. Feeling of instability, slight	2. Feeling of instability, severe	Unstable (1, no 0)	1. There is a sense of dislocation, slight	2. There is a sense of dislocation, severe	Knee dislocation (1 for yes, 0 for no)	1. There is a sense of dislocation, slight	2. There is a sense of dislocation, severe	Patellar dislocation (1 for presence, 0 for absence)	1. There is stiffness, slight	2. There is stiffness, severe	Stiff (1 if yes, 0 if no)	Damage (1 if available, 0 if not)	Is the injury fresh? Within two weeks (yes 1, no 0)	Make a sound when hurt (1 if yes, 0 if no)	2. Knee valgum (X-shaped legs)	3. Knee varum (O-knee)	Malformation (1, no 0)	2. Limb thinning and atrophy (quadriceps atrophy)	3. Bone enlargement in the joints	4. Swelling and effusion in the joints (1 for yes, 0 for no)
Variable abbreviation	Number	KOA	MeniscusTear	GeneralFreeBody	PatellarPain	PatellarInstab	ACL	PCL	MCL	LCL	Name	Sex	Age	BMI	KneeSorD	FlexionLimitMild	FlexionLimitSevere	FlexionLimit	ExtensionLimitMild	ExtensionLimitSevere	ExtensionLimit	SnapMild	SnapModerate	SnapSevere	Snapping	LockingMild	LockingSevere	Locking	InstabilityMild	InstabilitySevere	Instability	KneeDislocationMild	KneeDislocationSevere	KneeDislocation	PatellarDislocationMild	PatellarDislocationSevere	PatellarDislocation	StiffnessMild	StiffnessSevere	Stiffness	Injure	InjurFresh	InjurZip	KnockKnees	BowLegs	Deformity	Atrophy	Intamescentia	Swelling
Knee osteoarthritis		48	27	4	6	1	5	0	0	0	0	38	0	0	32	22	0	22	6	0	6	24	2	9	35	11	6	17	20	0	20	0	5	5	0	0	0	16	0	16	19	3	5	2	2	3	0	0	12
Knee osteoarthritis related		1	0.5625	0.0833333	0.125	0.0208333	0.104167	0	0	0	0	0.791667	0	0	0.666667	0.458333	0	0.458333	0.125	0	0.125	0.5	0.0416667	0.1875	0.729167	0.229167	0.125	0.354167	0.416667	0	0.416667	0	0.104167	0.104167	0	0	0	0.333333	0	0.333333	0.395833	0.0625	0.104167	0.0416667	0.0416667	0.0625	0	0	0.25
Meniscus injury		27	87	4	6	3	17	3	0	0	0	37	0	0	73	44	1	46	18	0	18	31	14	9	54	17	5	22	32	1	34	4	5	10	2	0	2	15	0	15	55	8	19	2	6	4	1	0	31
Meniscus injury related		0.310345	1	0.045977	0.0689655	0.0344828	0.195402	0.0344828	0	0	0	0.425287	0	0	0.83908	0.505747	0.0114943	0.528736	0.206897	0	0.206897	0.356322	0.16092	0.103448	0.62069	0.195402	0.0574713	0.252874	0.367816	0.0114943	0.390805	0.045977	0.0574713	0.114943	0.0229885	0	0.0229885	0.172414	0	0.172414	0.632184	0.091954	0.218391	0.0229885	0.0689655	0.045977	0.0114943	0	0.356322
General free bodies		4	4	9	0	1	0	0	0	0	0	6	0	0	9	7	0	7	3	0	3	3	1	3	7	3	4	7	4	0	4	0	0	0	1	0	1	4	0	4	7	1	2	1	0	1	0	0	2
General loose body correlation		0.444444	0.444444	1	0	0.111111	0	0	0	0	0	0.666667	0	0	1	0.777778	0	0.777778	0.333333	0	0.333333	0.333333	0.111111	0.333333	0.777778	0.333333	0.444444	0.777778	0.444444	0	0.444444	0	0	0	0.111111	0	0.111111	0.444444	0	0.444444	0.777778	0.111111	0.222222	0.111111	0	0.111111	0	0	0.222222
Patellofemoral pain		6	6	0	17	1	2	1	0	0	0	13	0	0	11	5	0	5	1	0	1	5	2	4	11	6	1	7	7	0	7	1	3	4	0	0	0	5	0	5	8	0	2	0	0	0	0	0	5
Patellofemoral pain related		0.352941	0.352941	0	1	0.0588235	0.117647	0.0588235	0	0	0	0.764706	0	0	0.647059	0.294118	0	0.294118	0.0588235	0	0.0588235	0.294118	0.117647	0.235294	0.647059	0.352941	0.0588235	0.411765	0.411765	0	0.411765	0.0588235	0.176471	0.235294	0	0	0	0.294118	0	0.294118	0.470588	0	0.117647	0	0	0	0	0	0.294118
Patellar instability		1	3	1	1	10	0	0	0	0	0	6	0	0	8	5	0	5	5	1	6	3	1	1	5	1	0	1	0	1	1	0	0	0	3	6	9	0	0	0	10	5	1	1	0	1	1	0	6
Patellar instability related		0.1	0.3	0.1	0.1	1	0	0	0	0	0	0.6	0	0	0.8	0.5	0	0.5	0.5	0.1	0.6	0.3	0.1	0.1	0.5	0.1	0	0.1	0	0.1	0.1	0	0	0	0.3	0.6	0.9	0	0	0	1	0.5	0.1	0.1	0	0.1	0.1	0	0.6
ACL tear/injury ACL		5	17	0	2	0	43	6	1	0	0	15	0	0	39	21	3	24	14	1	15	8	5	1	14	10	0	10	32	4	37	9	16	26	1	0	1	6	0	6	42	9	22	0	0	0	6	0	24
Anterior cruciate ligament tear/injury association		0.116279	0.395349	0	0.0465116	0	1	0.139535	0.0232558	0	0	0.348837	0	0	0.906977	0.488372	0.0697674	0.55814	0.325581	0.0232558	0.348837	0.186047	0.116279	0.0232558	0.325581	0.232558	0	0.232558	0.744186	0.0930233	0.860465	0.209302	0.372093	0.604651	0.0232558	0	0.0232558	0.139535	0	0.139535	0.976744	0.209302	0.511628	0	0	0	0.139535	0	0.55814
Posterior cruciate ligament tear/injury PCL		0	3	0	1	0	6	16	3	0	0	3	0	0	16	12	0	12	6	0	6	1	1	0	2	1	0	1	6	5	11	7	5	12	0	0	0	0	0	0	16	2	3	0	1	1	0	0	13
Posterior cruciate ligament tear/injury correlation		0	0.1875	0	0.0625	0	0.375	1	0.1875	0	0	0.1875	0	0	1	0.75	0	0.75	0.375	0	0.375	0.0625	0.0625	0	0.125	0.0625	0	0.0625	0.375	0.3125	0.6875	0.4375	0.3125	0.75	0	0	0	0	0	0	1	0.125	0.1875	0	0.0625	0.0625	0	0	0.8125
Medial collateral ligament tear/injury MCL		0	0	0	0	0	1	3	3	0	0	0	0	0	3	2	0	2	2	0	2	0	0	0	0	0	0	0	0	3	3	1	0	1	0	0	0	0	0	0	3	1	0	0	0	0	0	0	2
Medial collateral ligament tear/injury association		0	0	0	0	0	0.333333	1	1	0	0	0	0	0	1	0.666667	0	0.666667	0.666667	0	0.666667	0	0	0	0	0	0	0	0	1	1	0.333333	0	0.333333	0	0	0	0	0	0	1	0.333333	0	0	0	0	0	0	0.666667
[truncated: 46 more columns]
